# Supplementary material
Source: PubMed Central journal article supplement (PMC2832744)

# Peptide-Catalyzed Kinetic Resolution of Formamides and Thioformamides as an Entry to Nonracemic Amines

Brandon S. Fowler, Peter J. Mikochik and Scott J. Miller\*

*Department of Chemistry, Yale University, P.O. Box 208107, New Haven, CT 06520-8107*

## XIII. $^1\text{H}$ NMR and $^{13}\text{C}$ NMR Spectra for Characterized Compounds

- i. Thioformamides **7**, **9** to **17** (S-33)
- ii. Peptide **6d** (S-44)
- iii. *N*-Boc-formamides **4** and **Boc-12-F** (S-45)
- iv. *N*-Boc-thioformamides **Boc-7**, **Boc-9** to **Boc-17** (S-47)
- v. Formamides **7-F**, **9-F** to **17-F** (S-57)

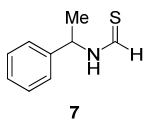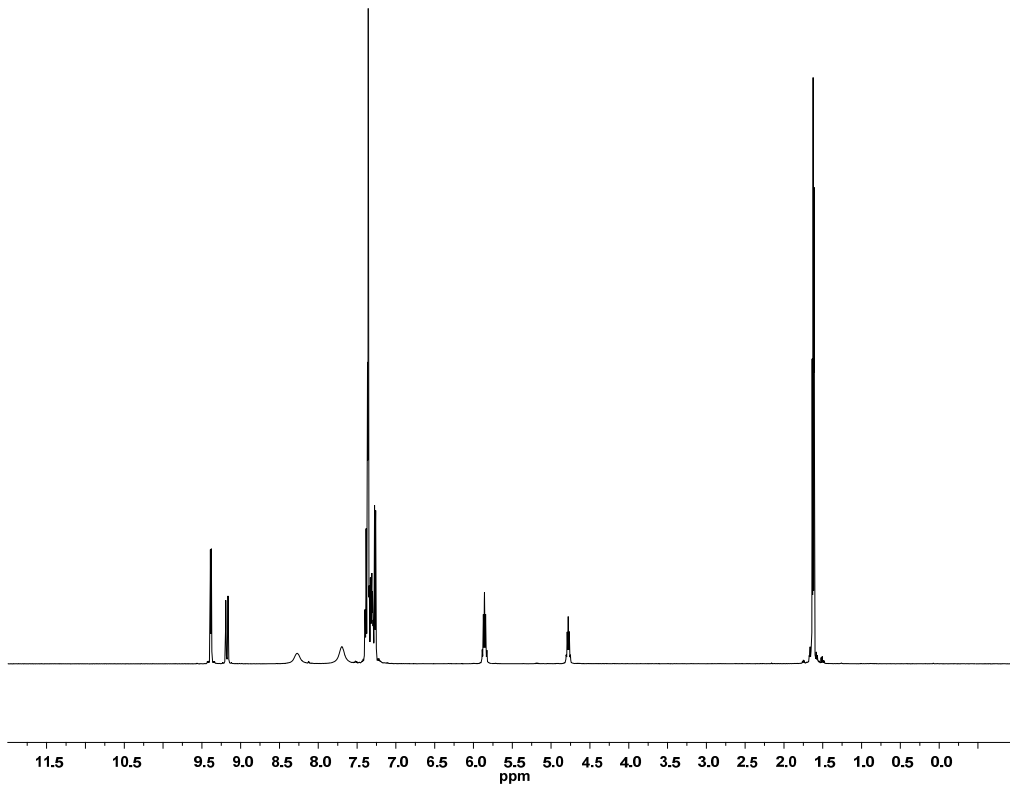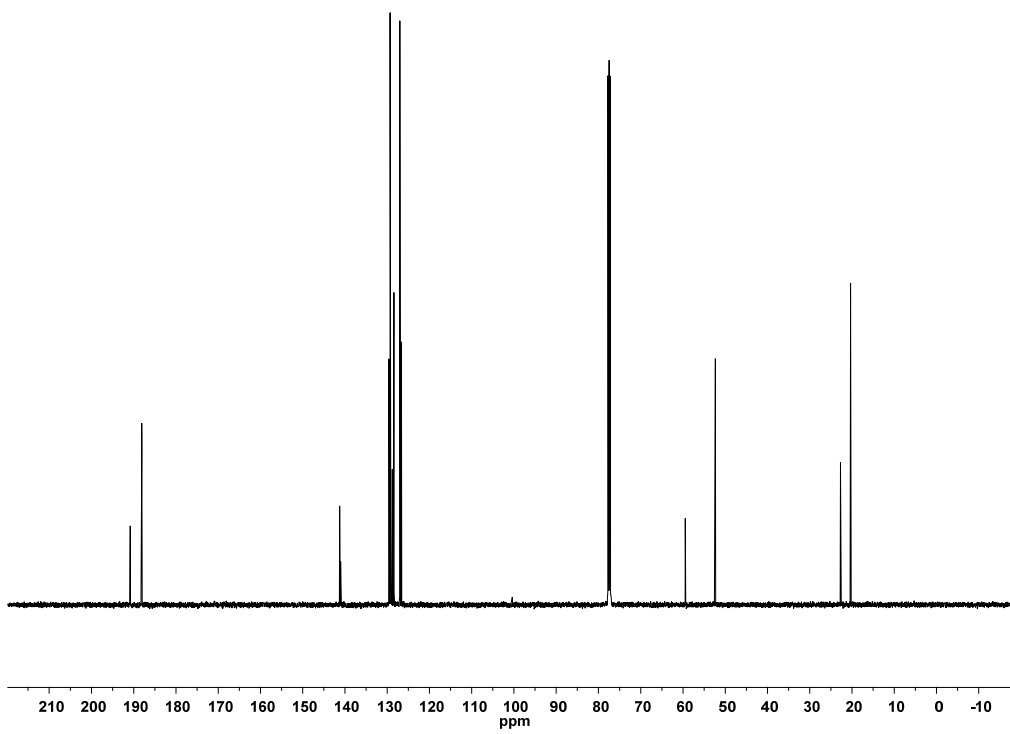

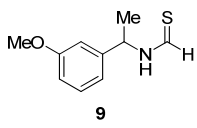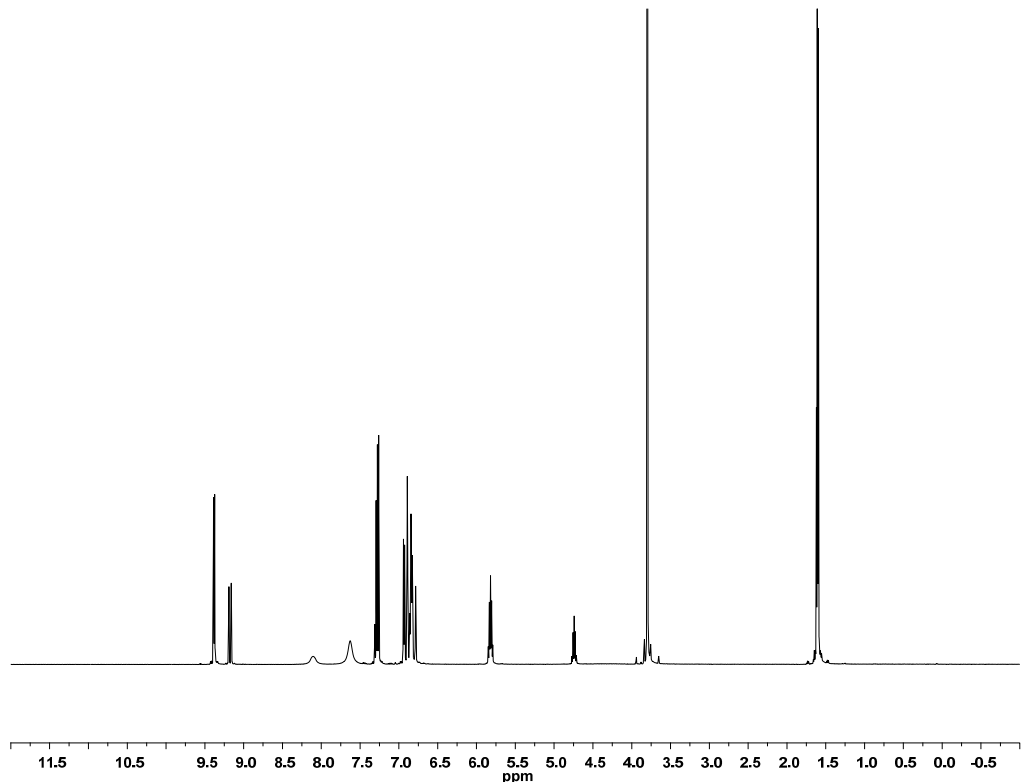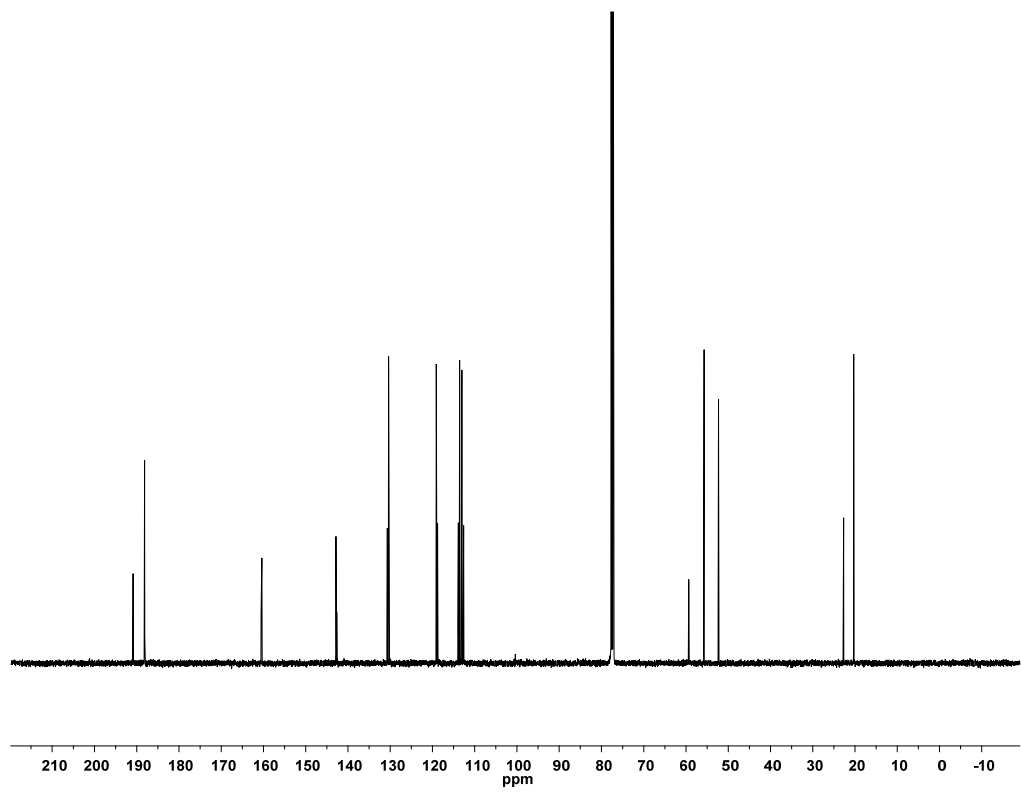

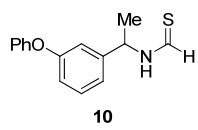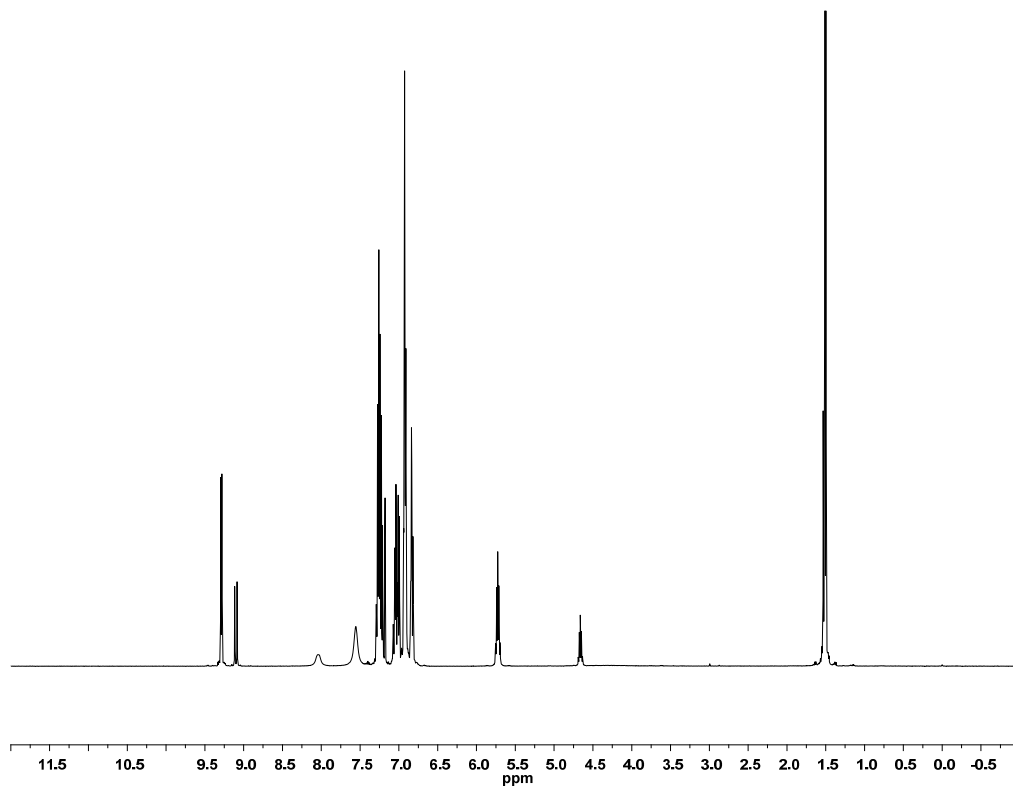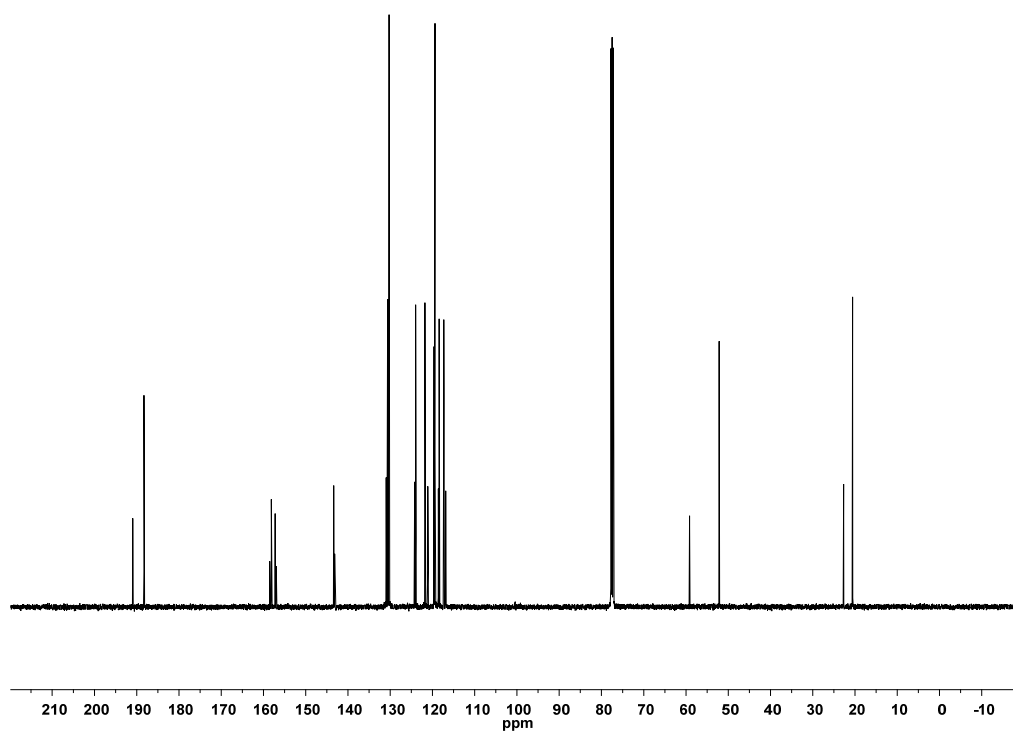

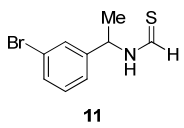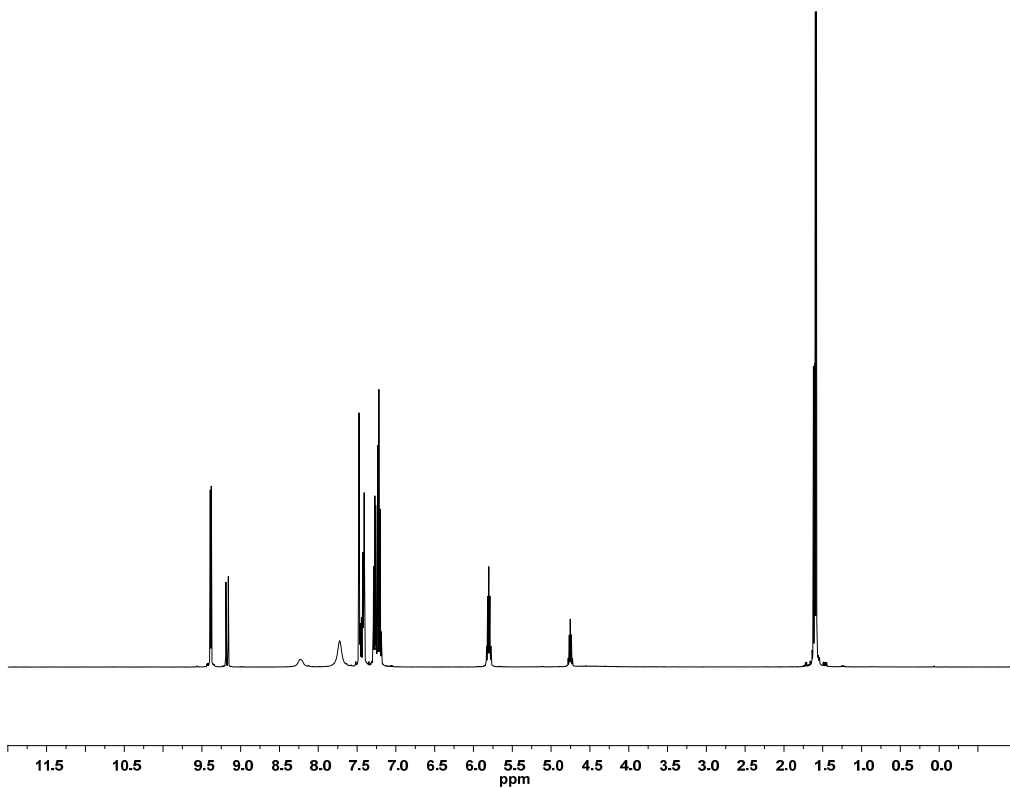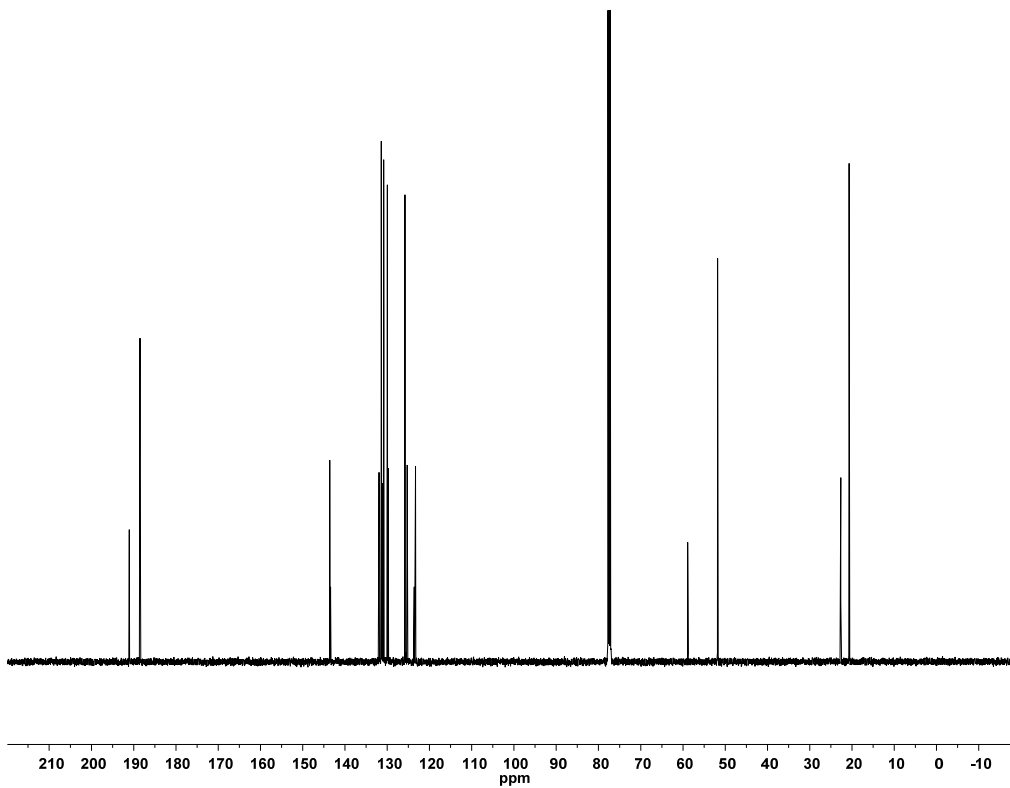

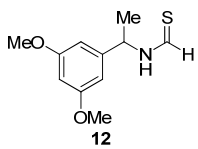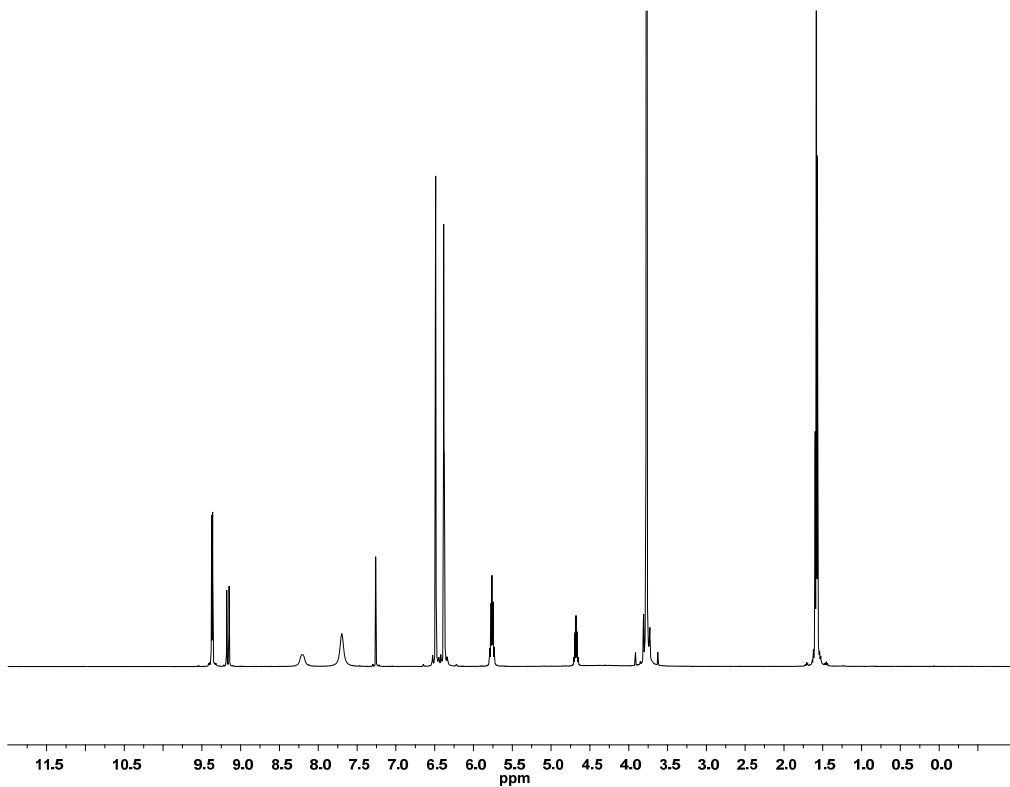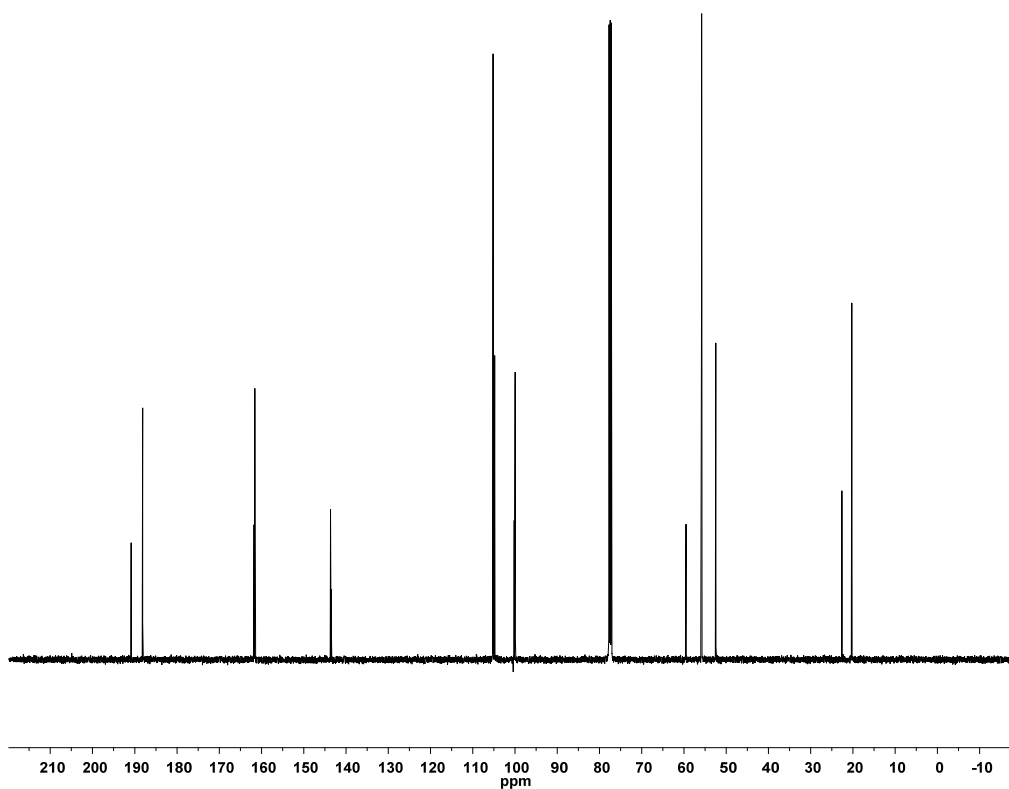

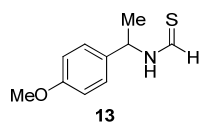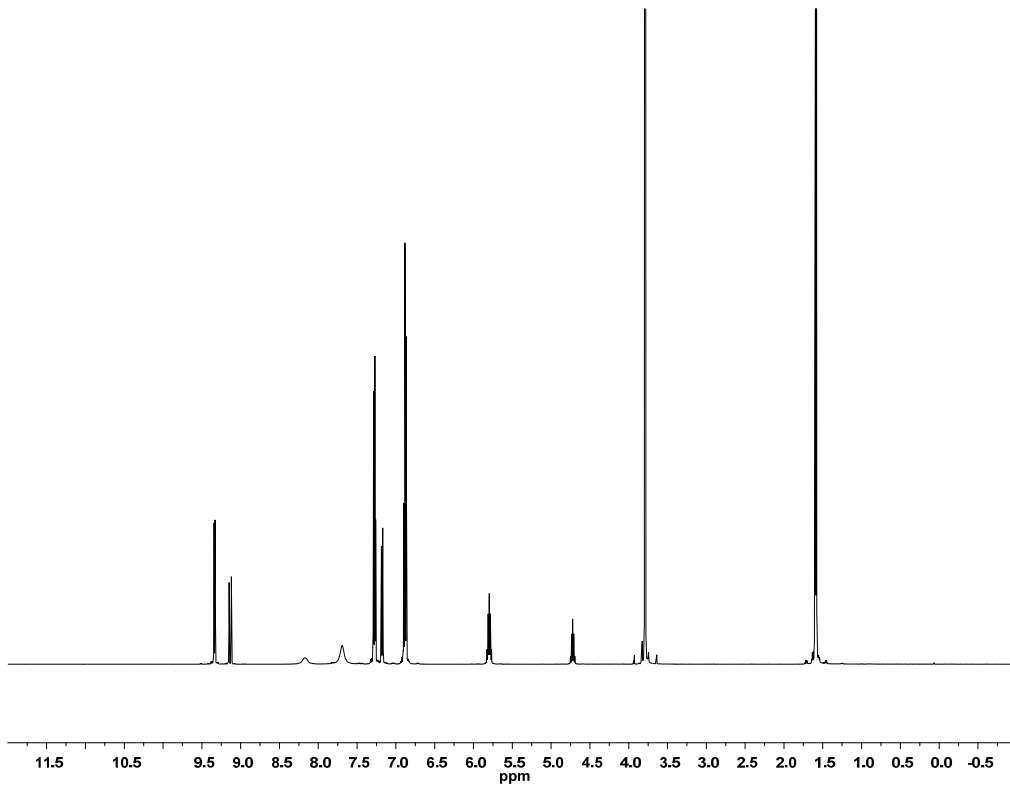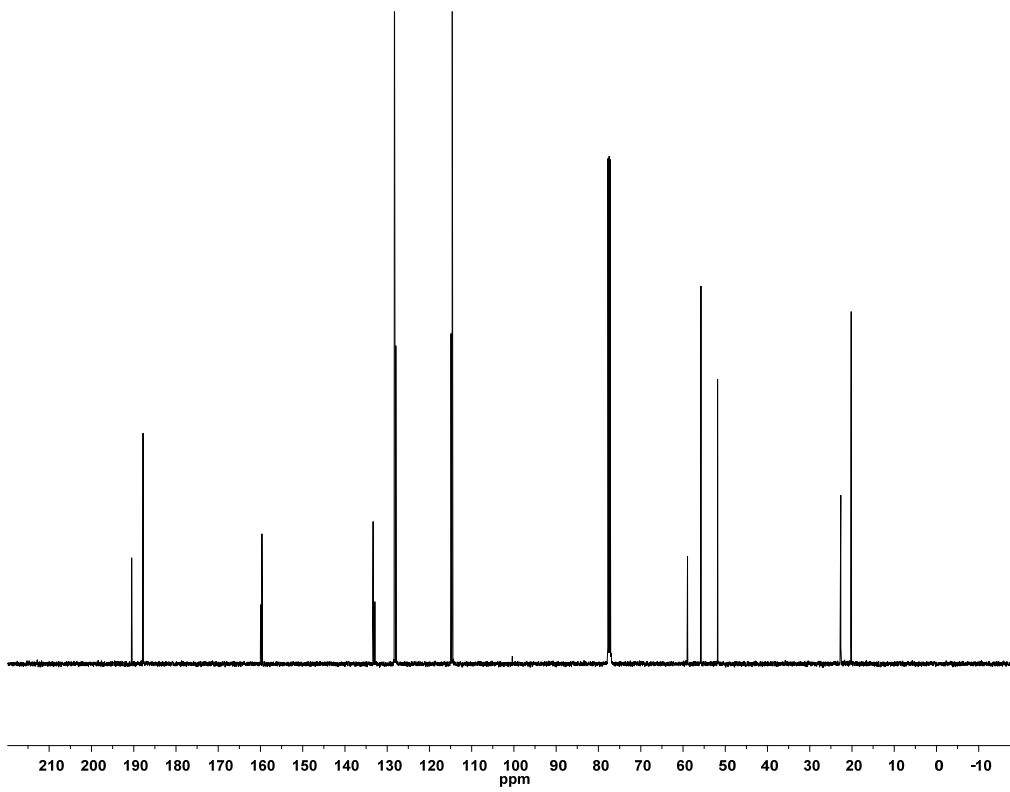

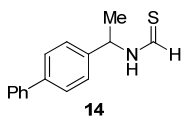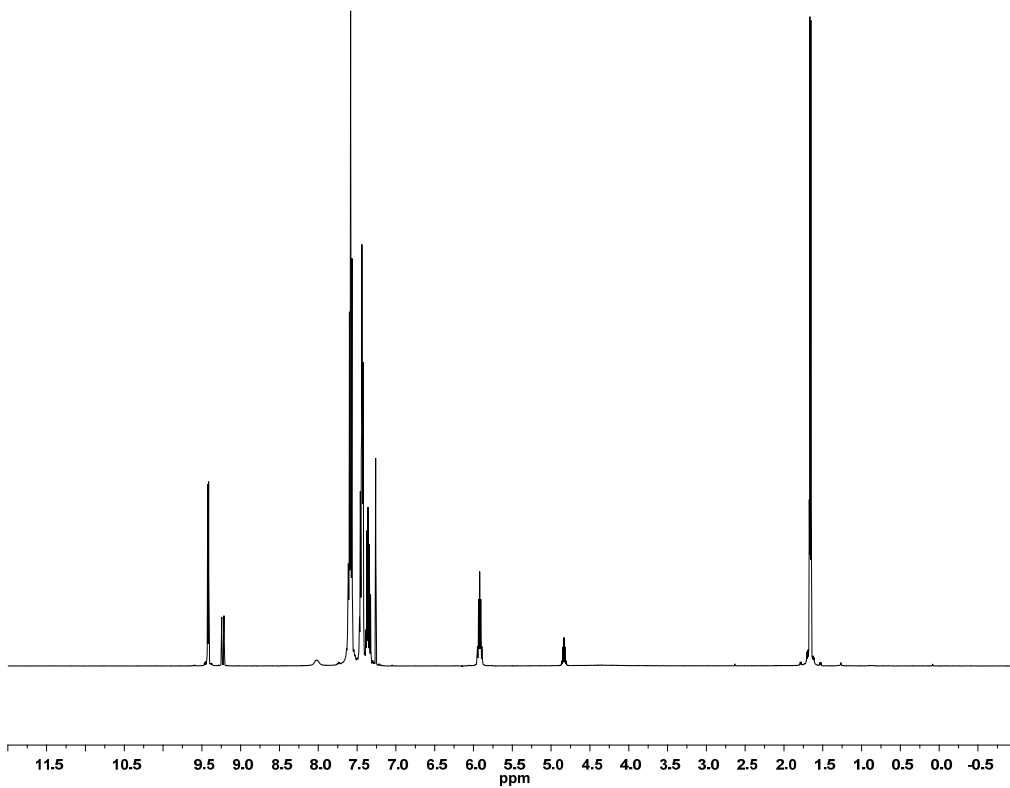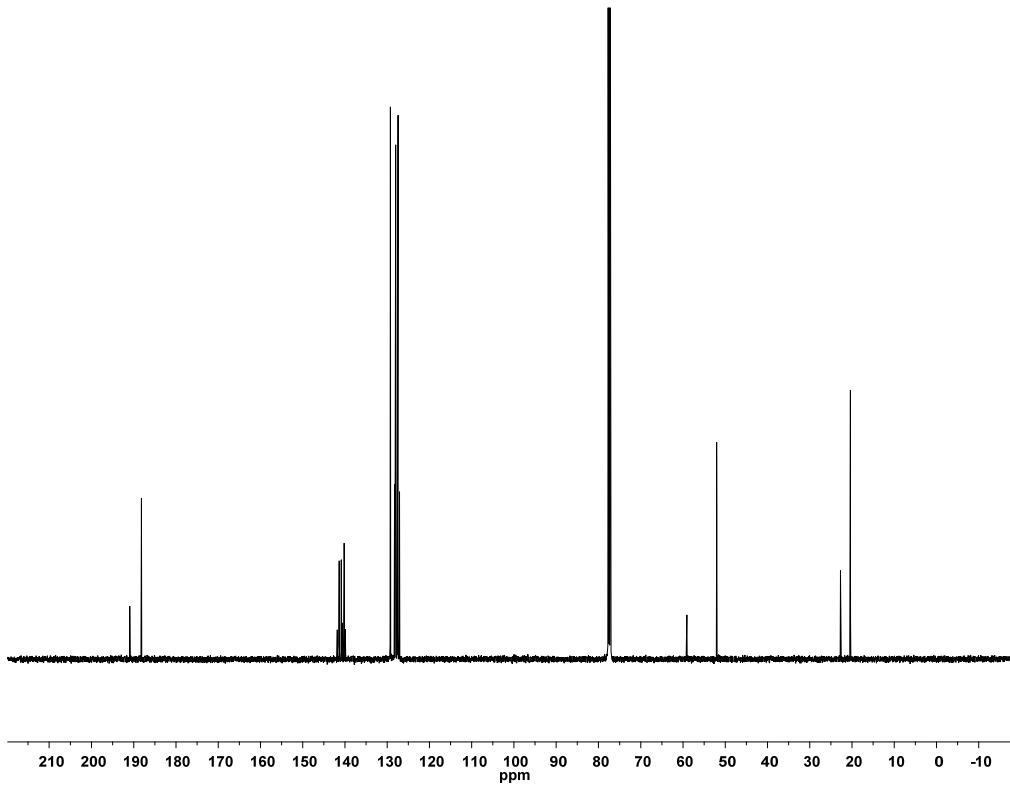



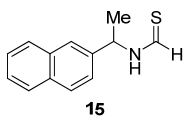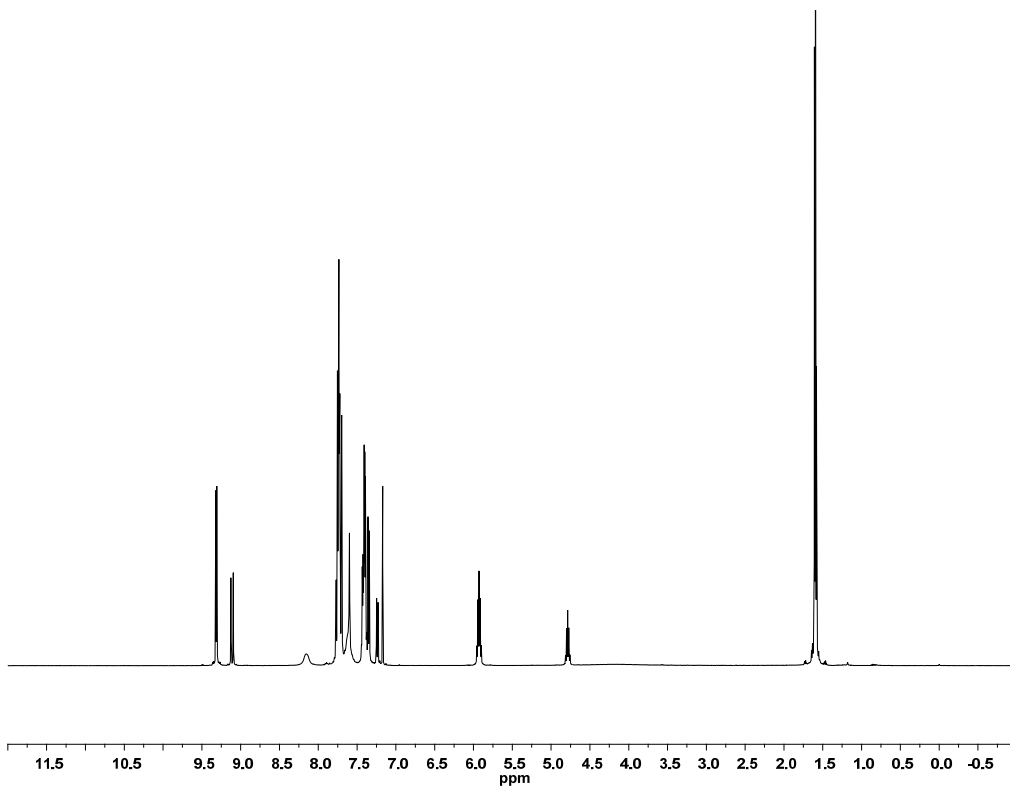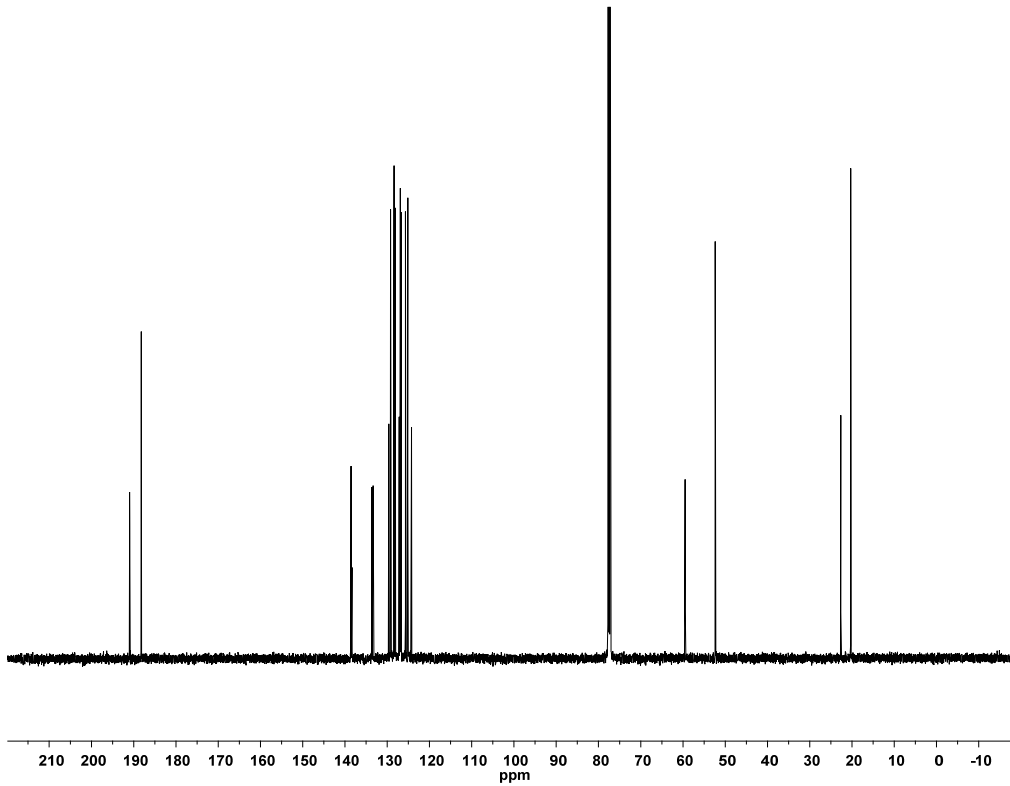

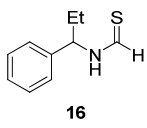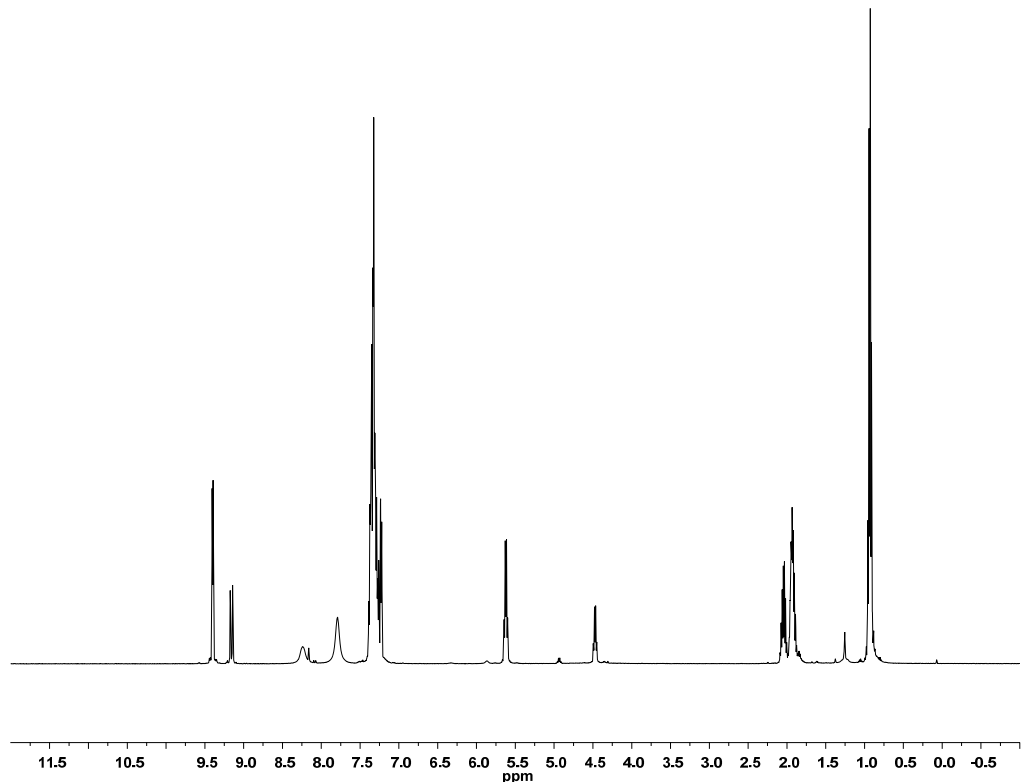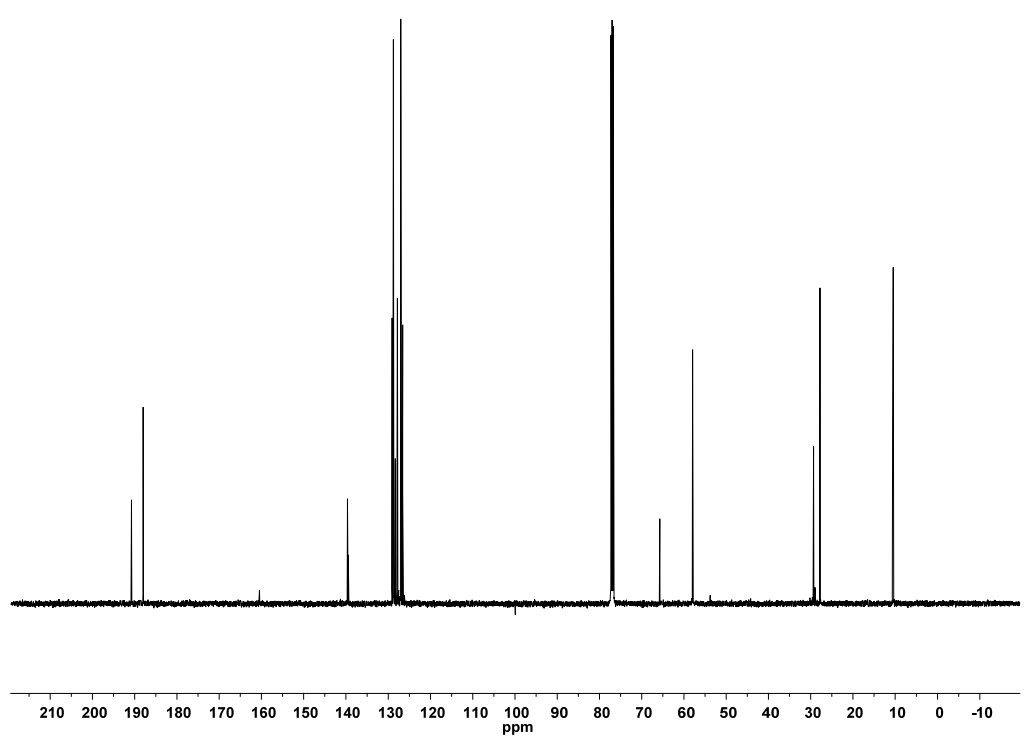

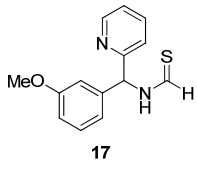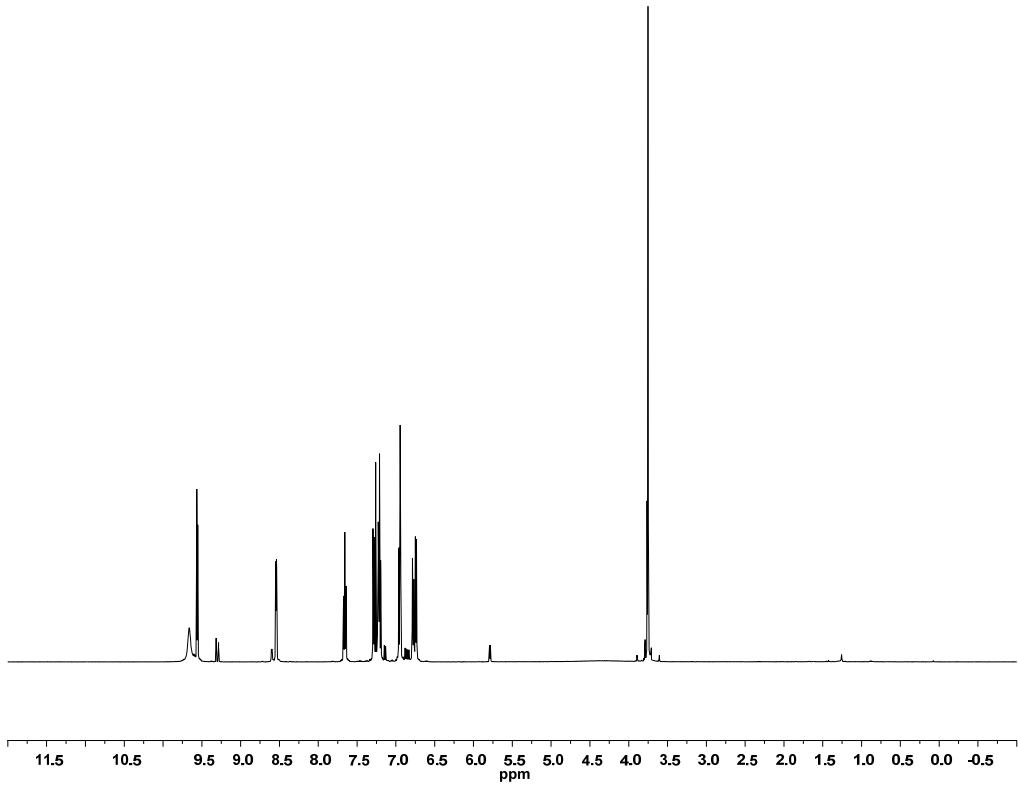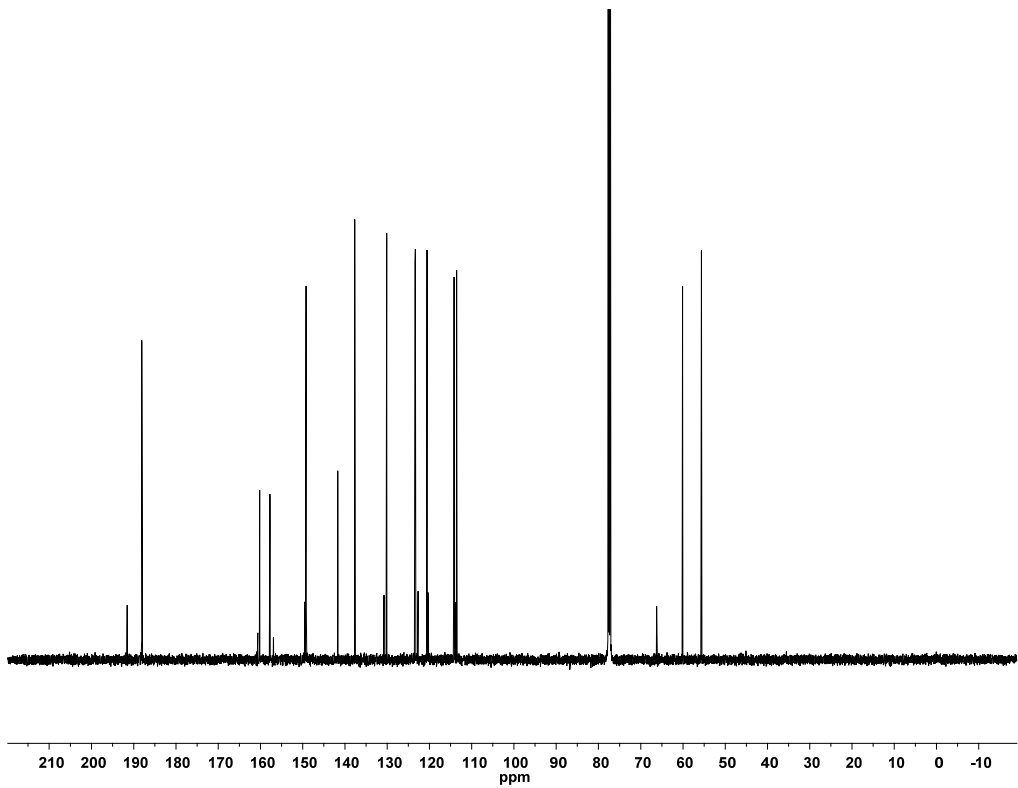



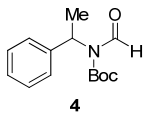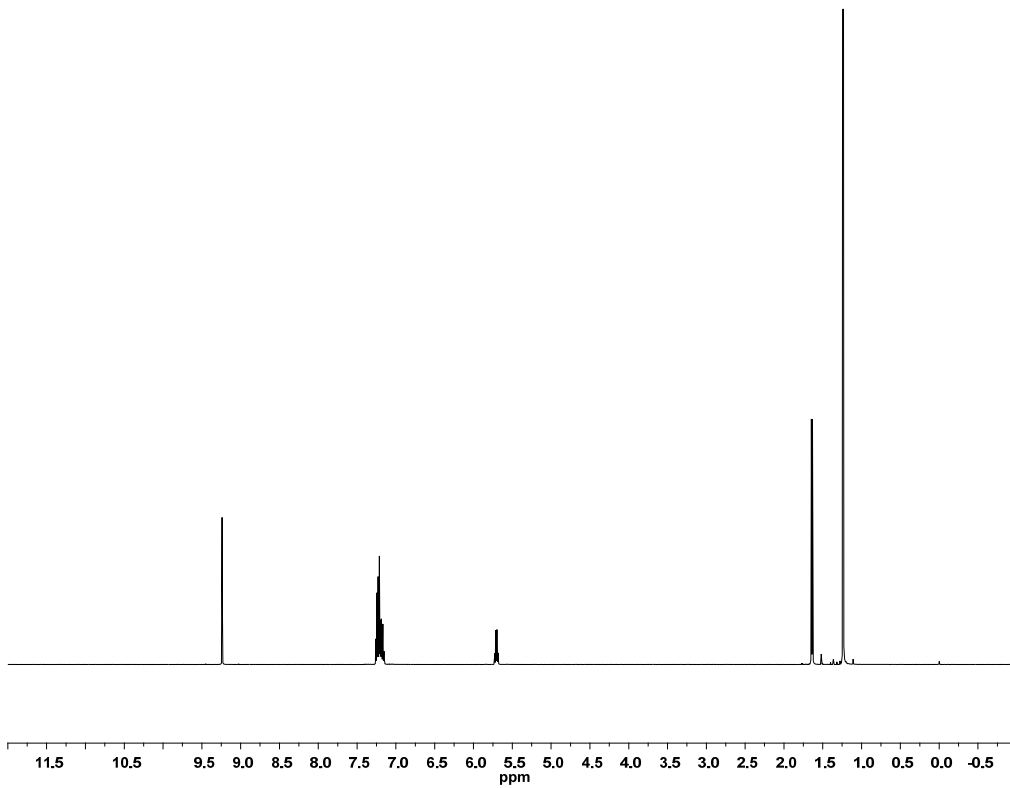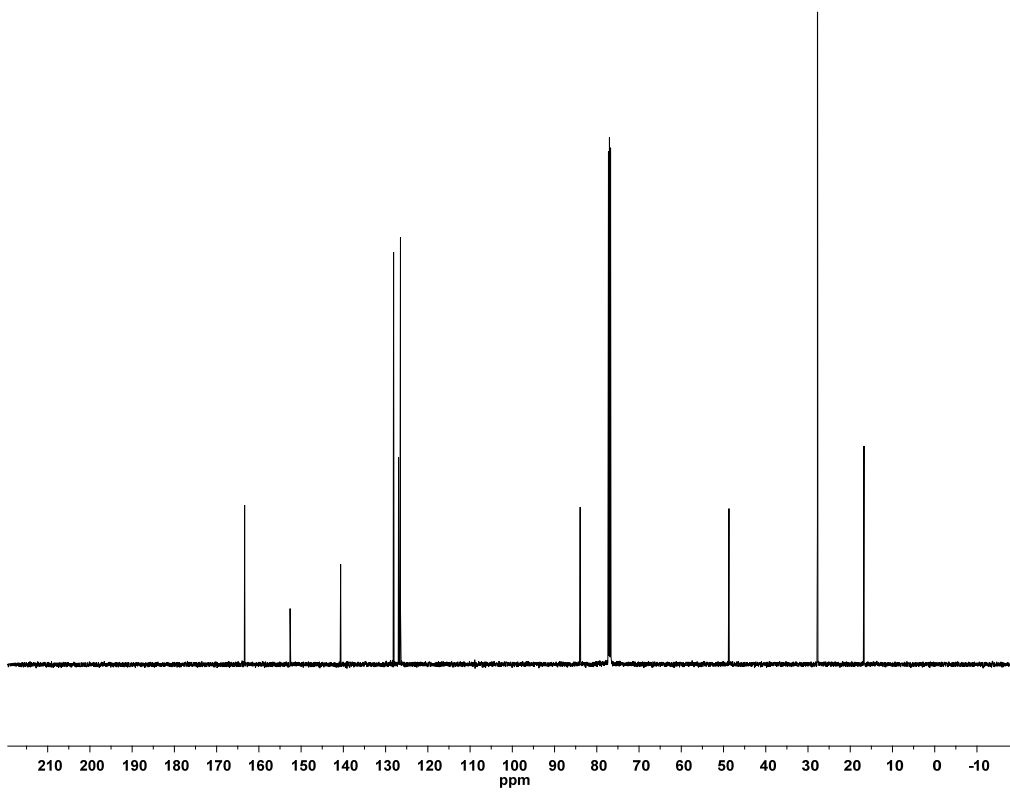

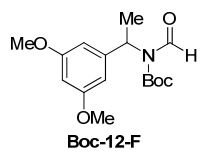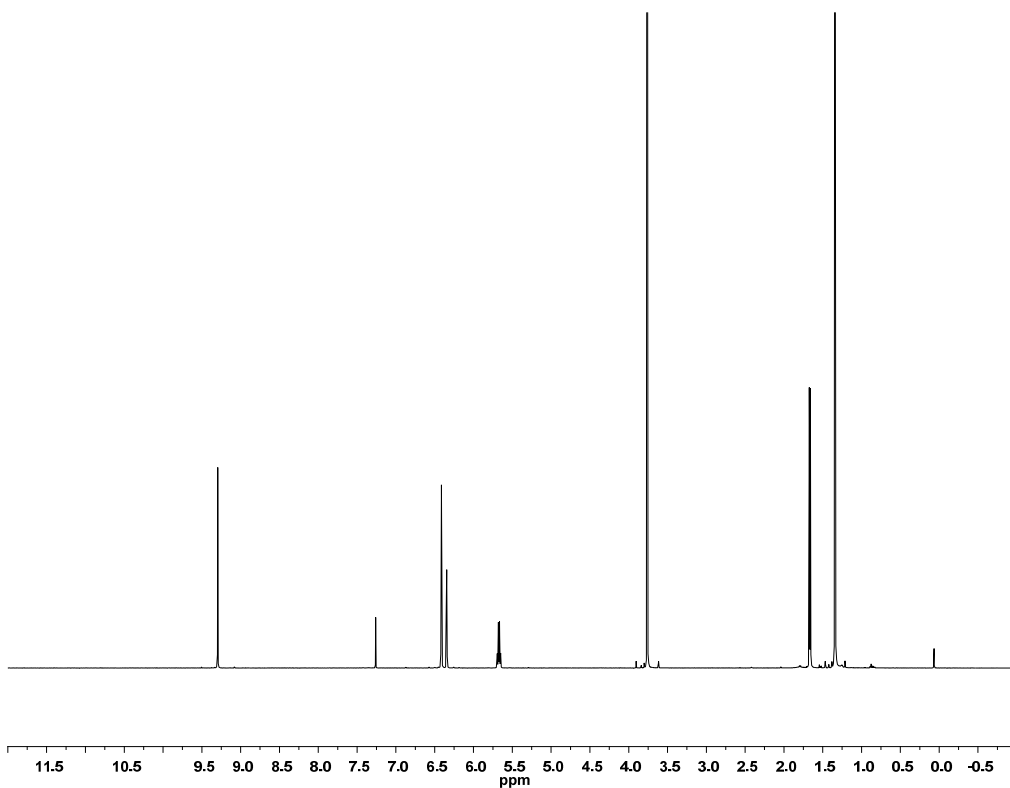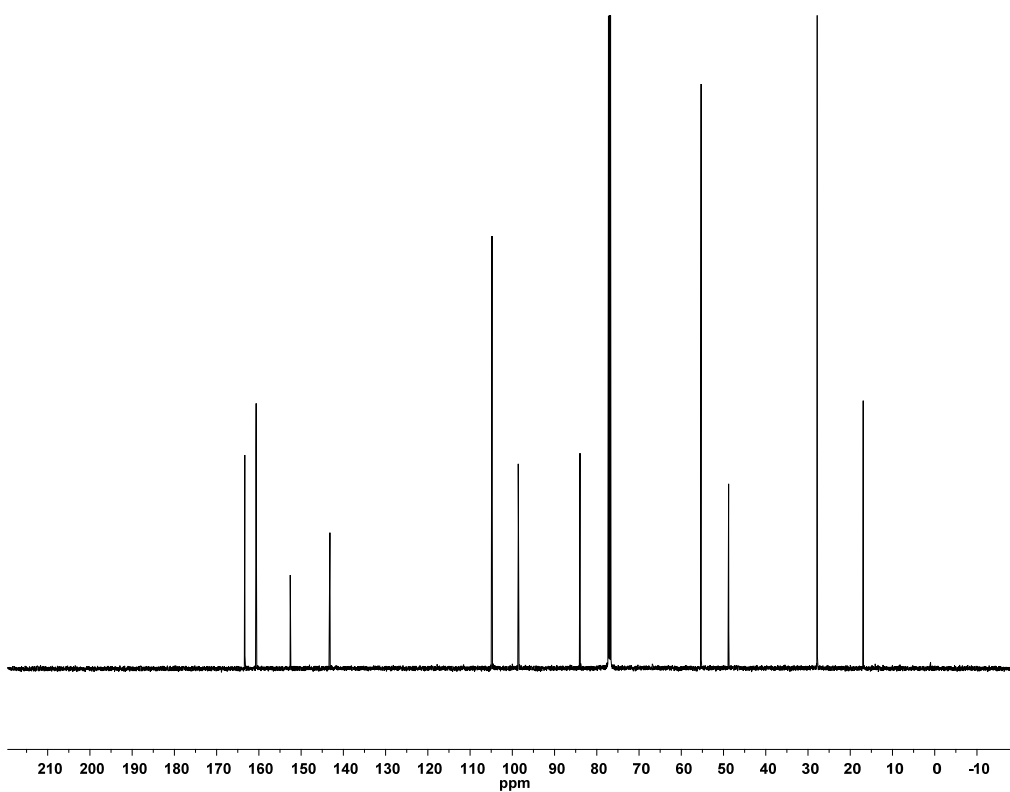

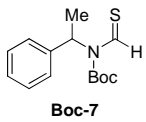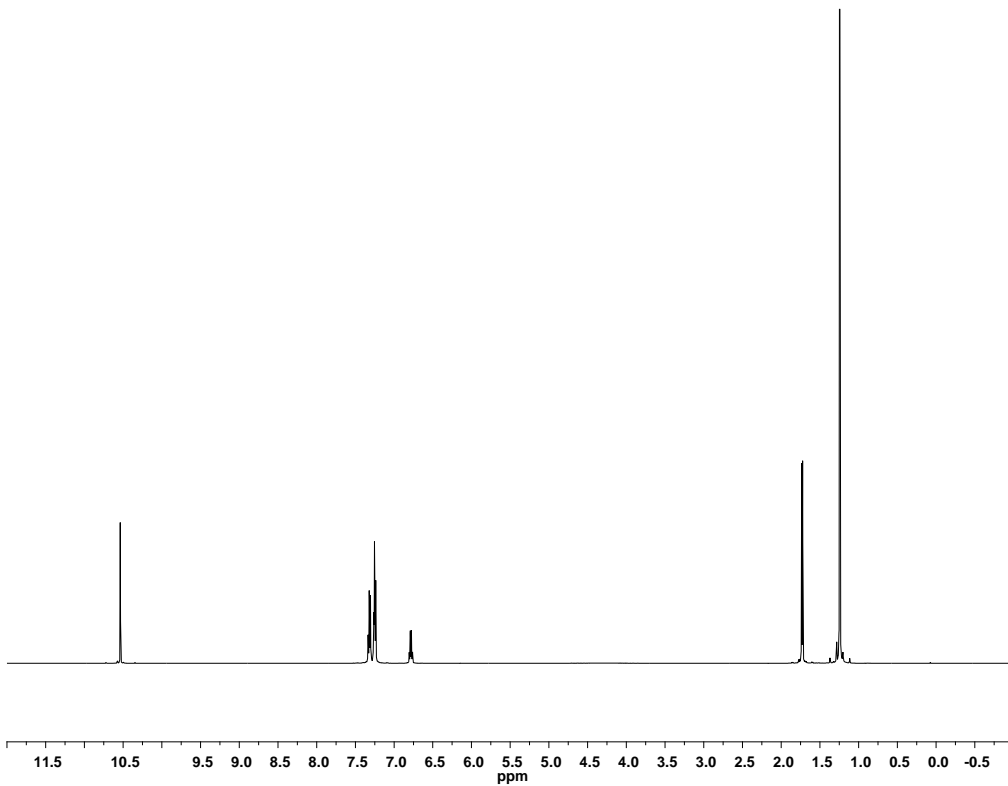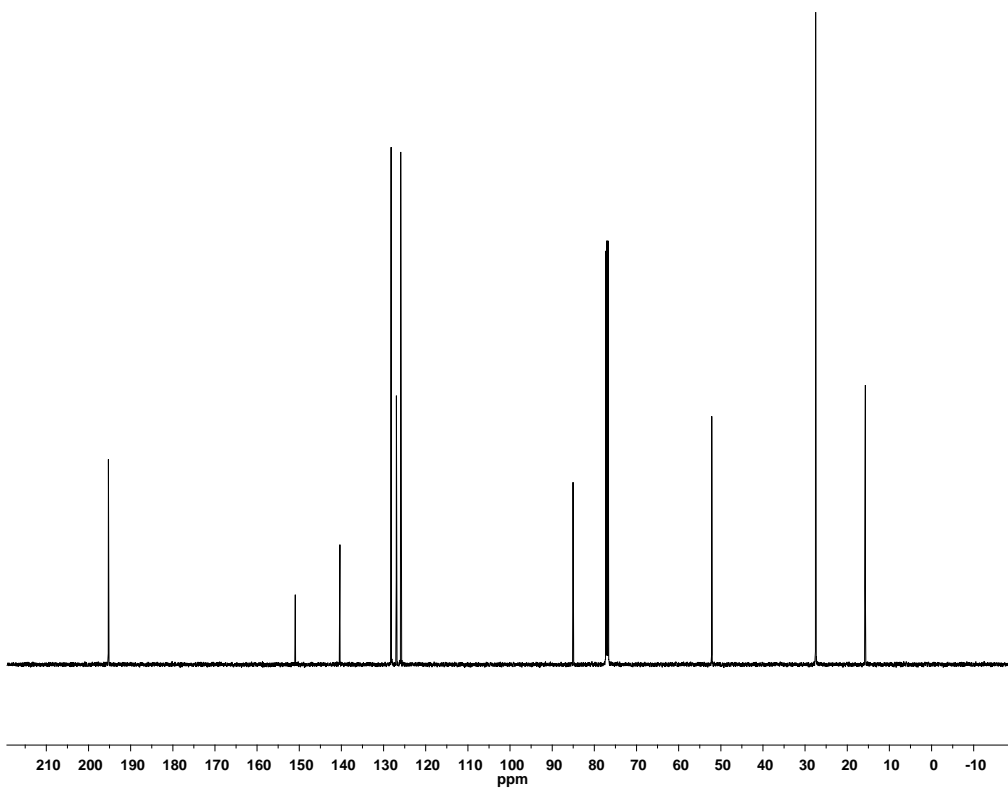

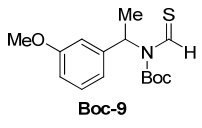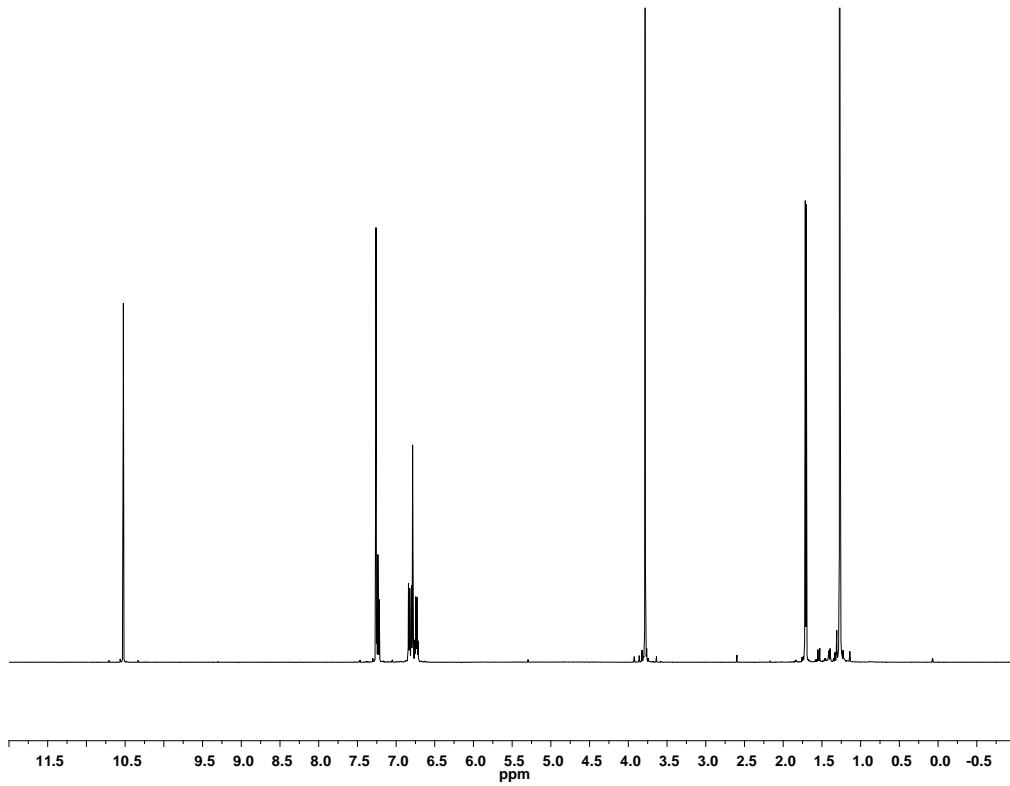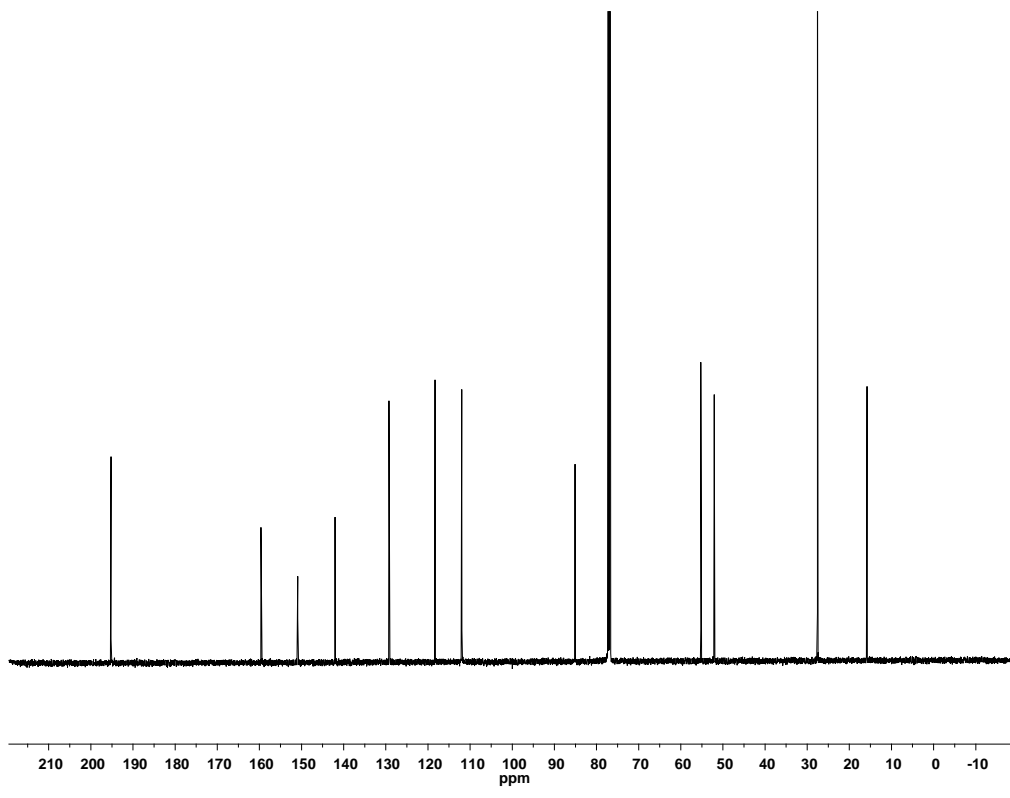



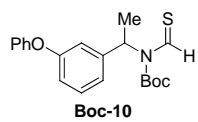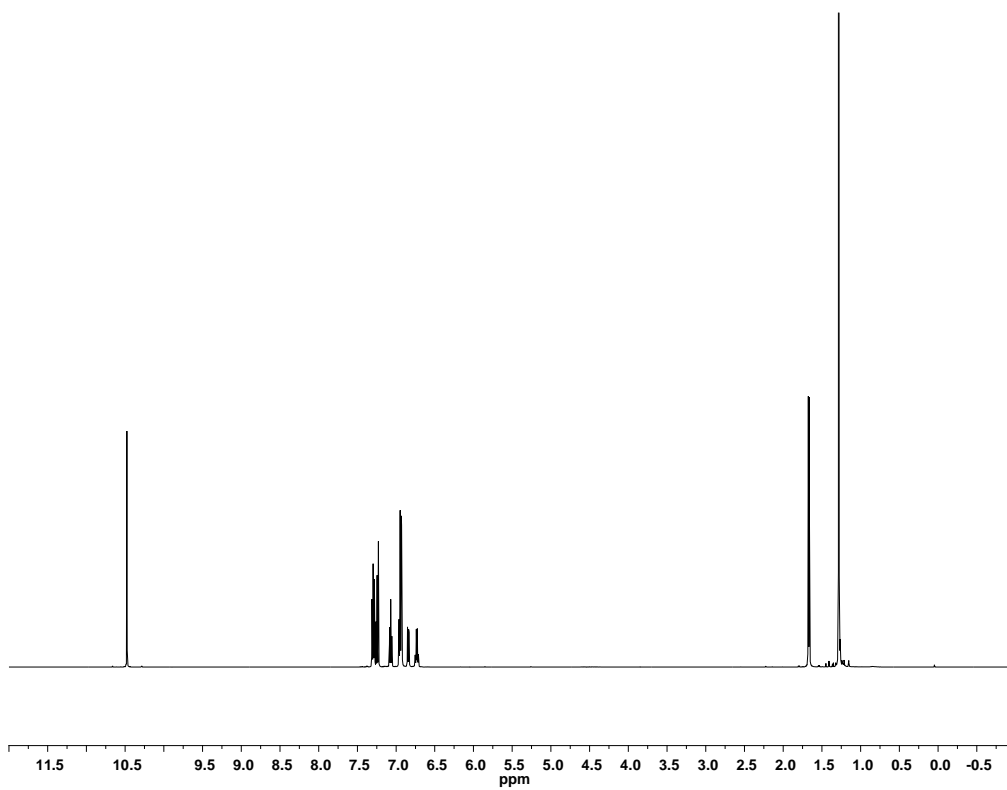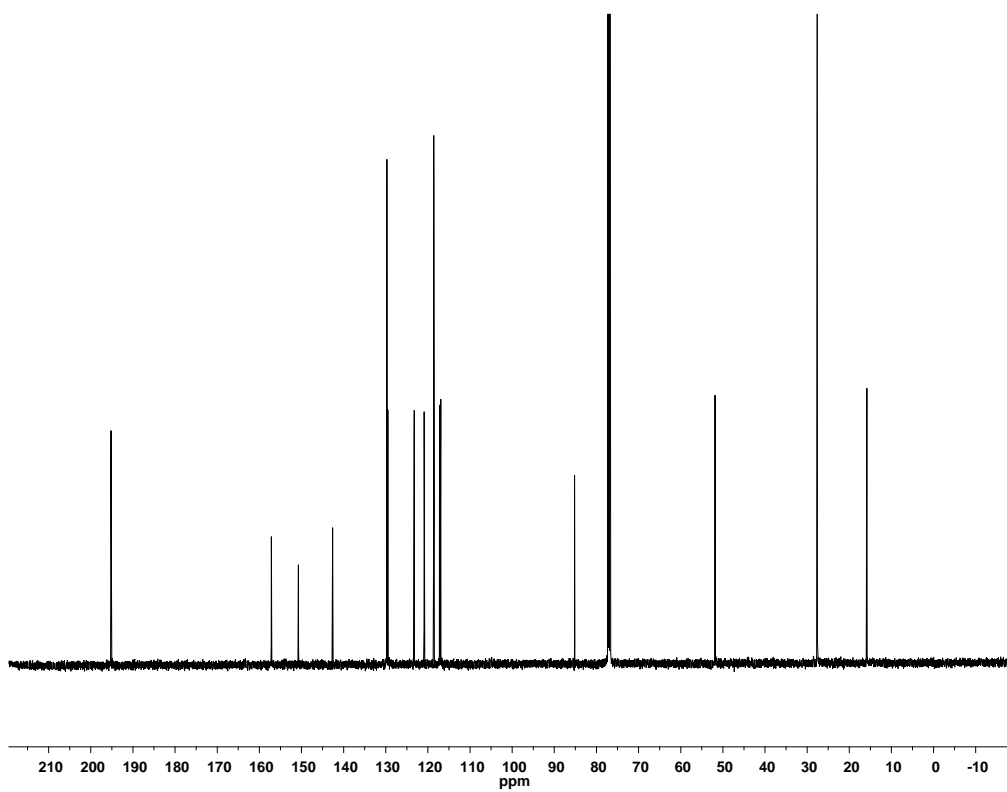

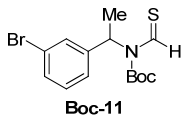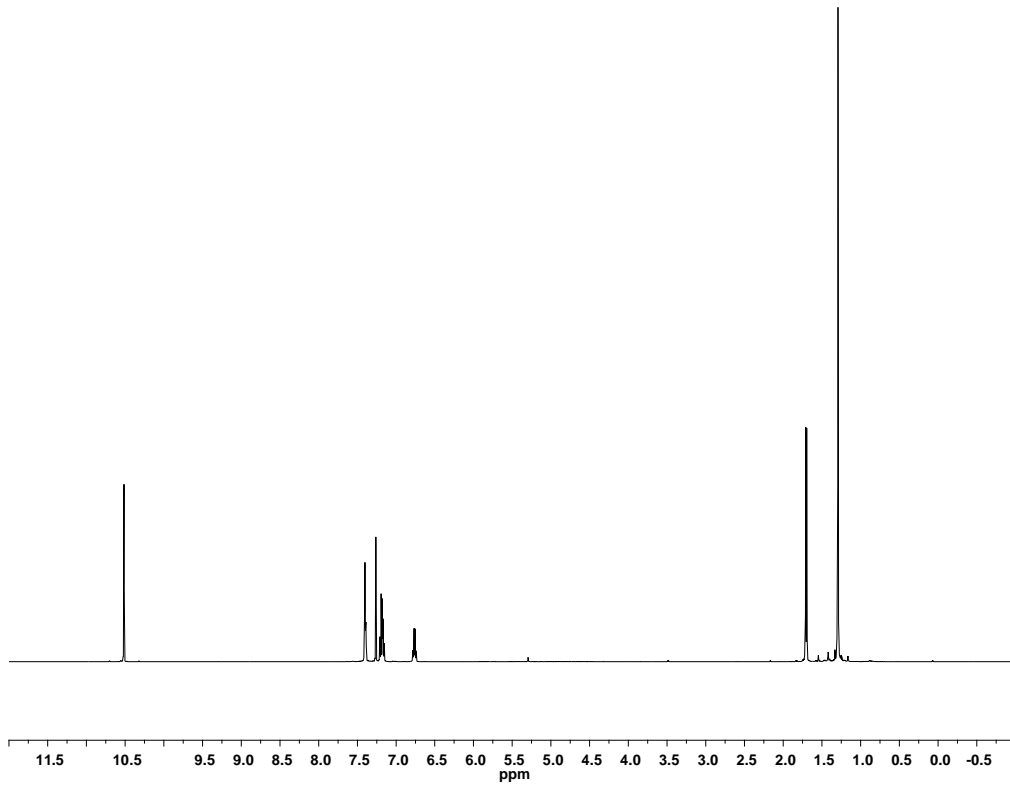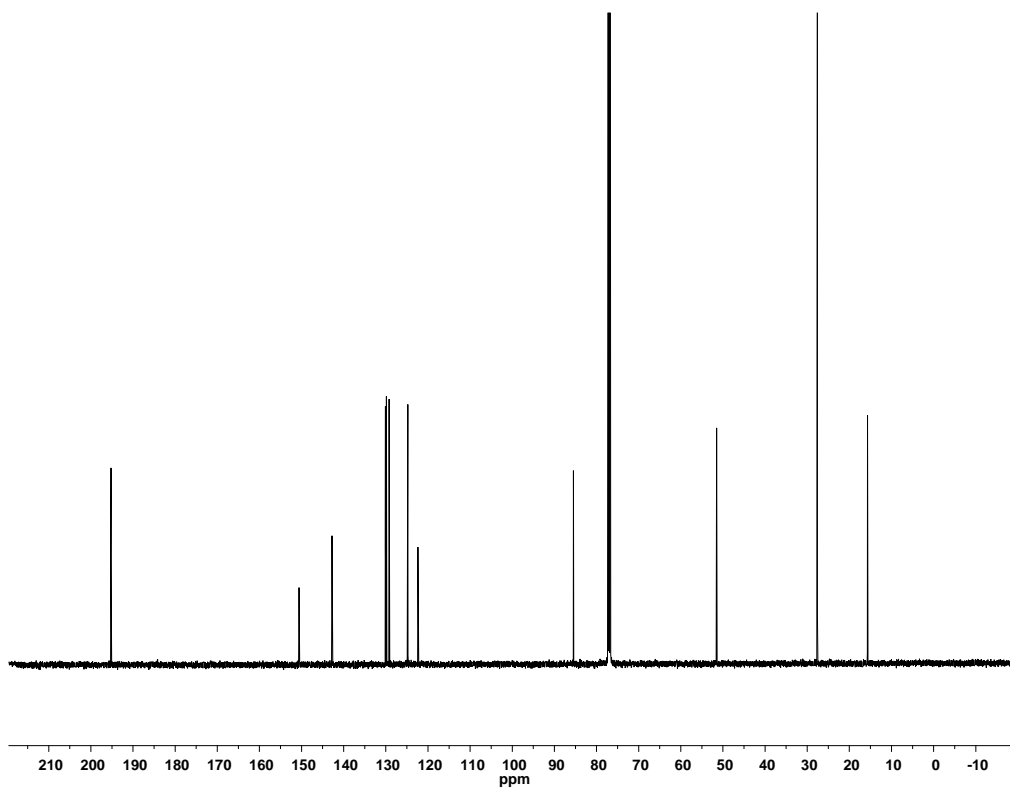

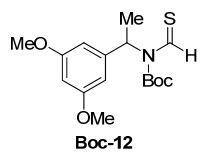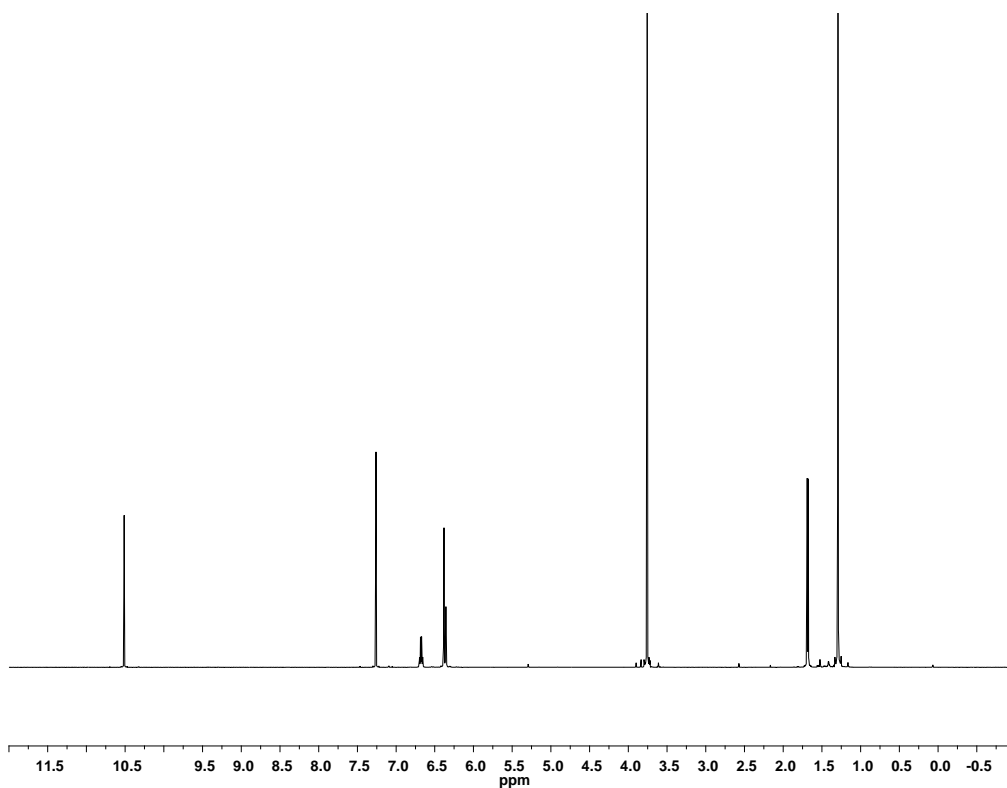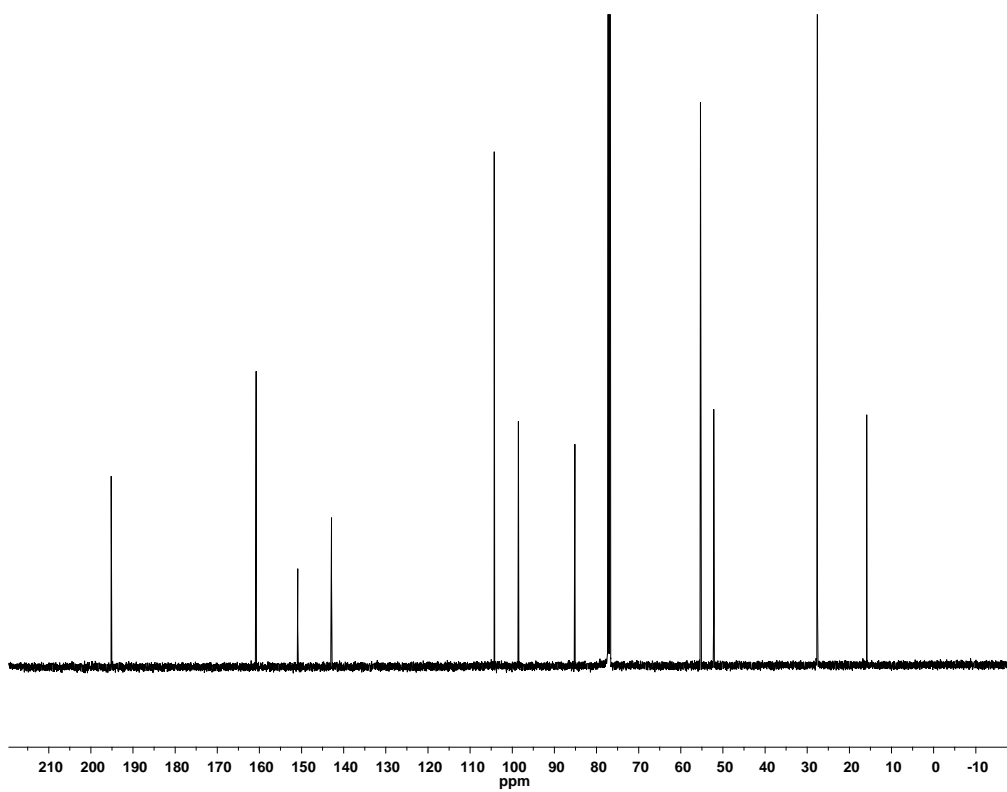

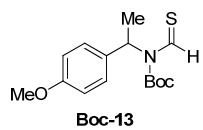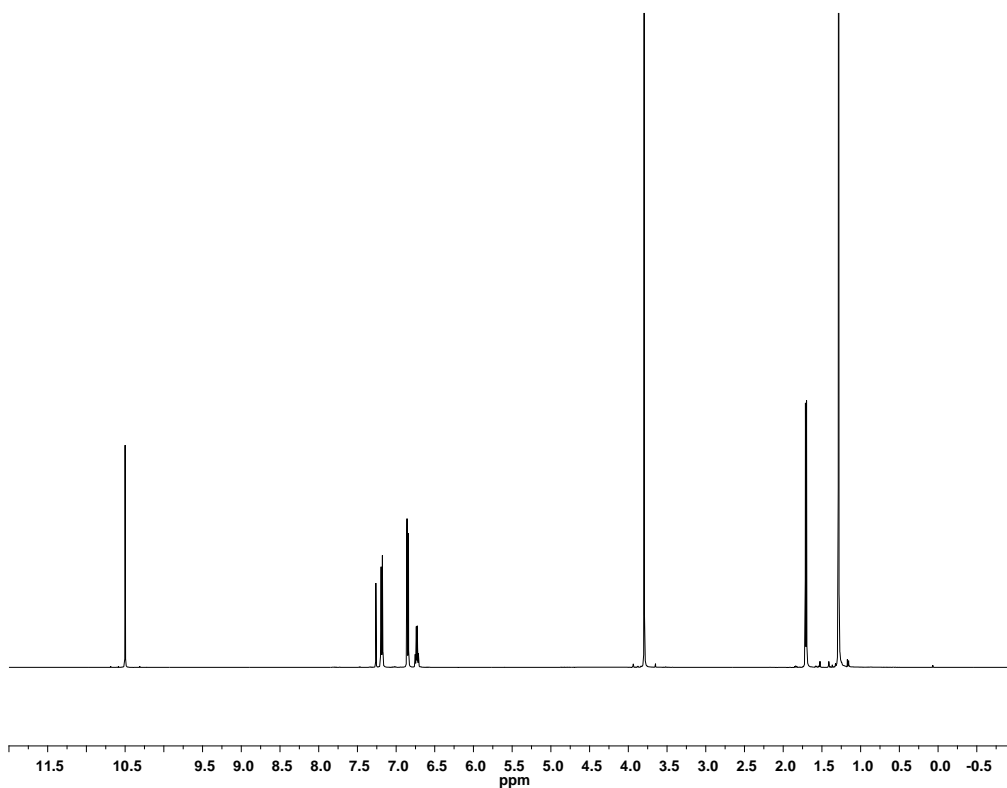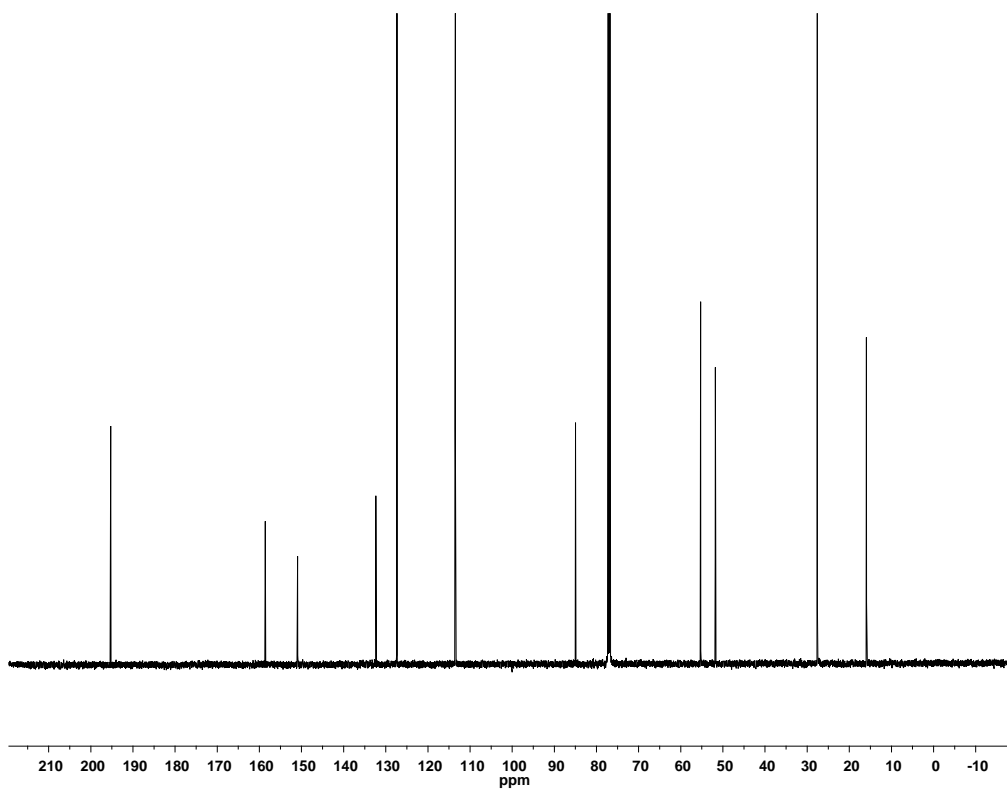

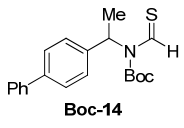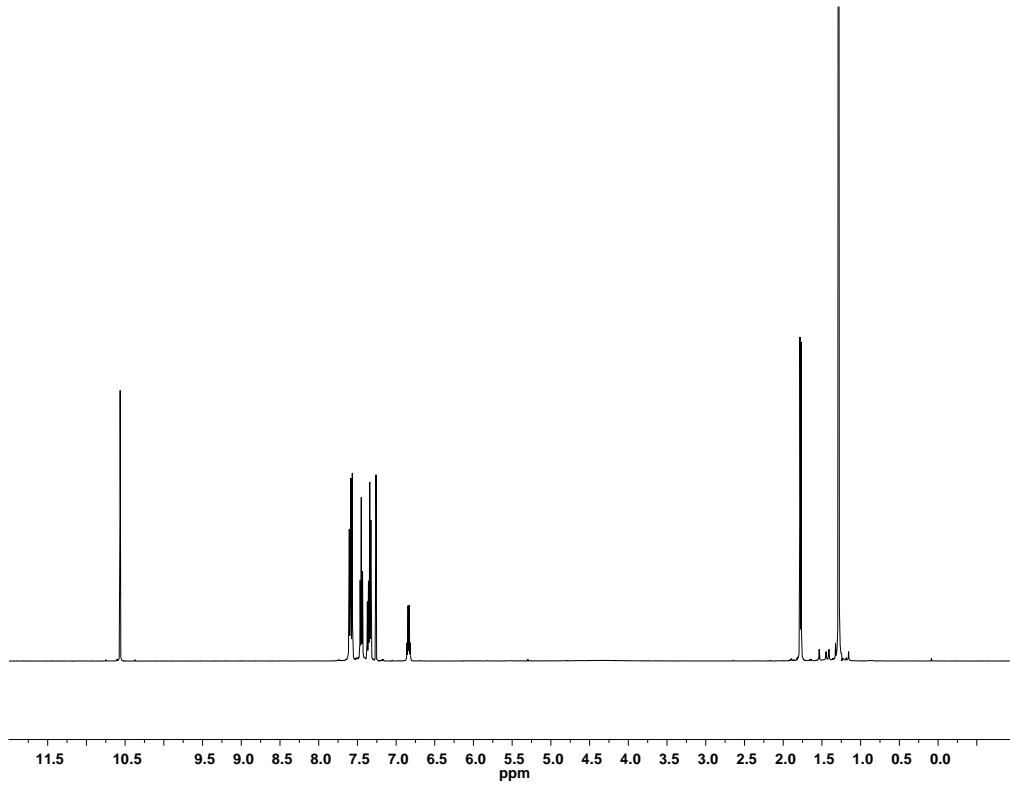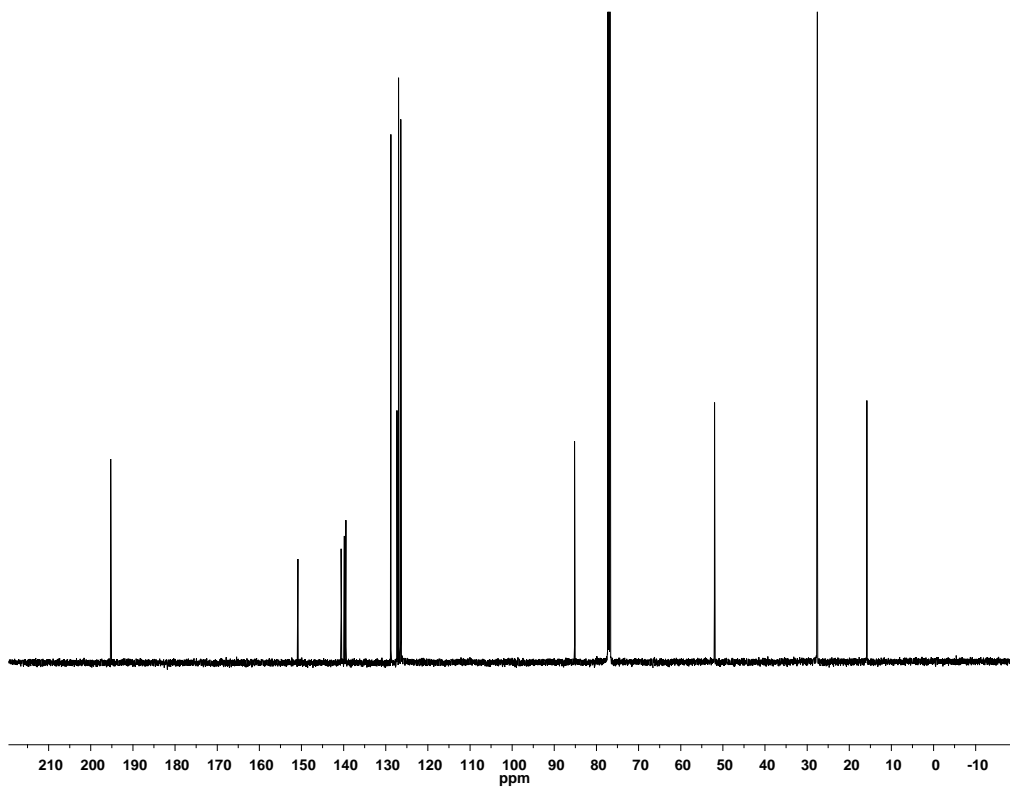

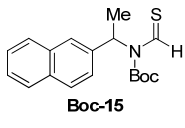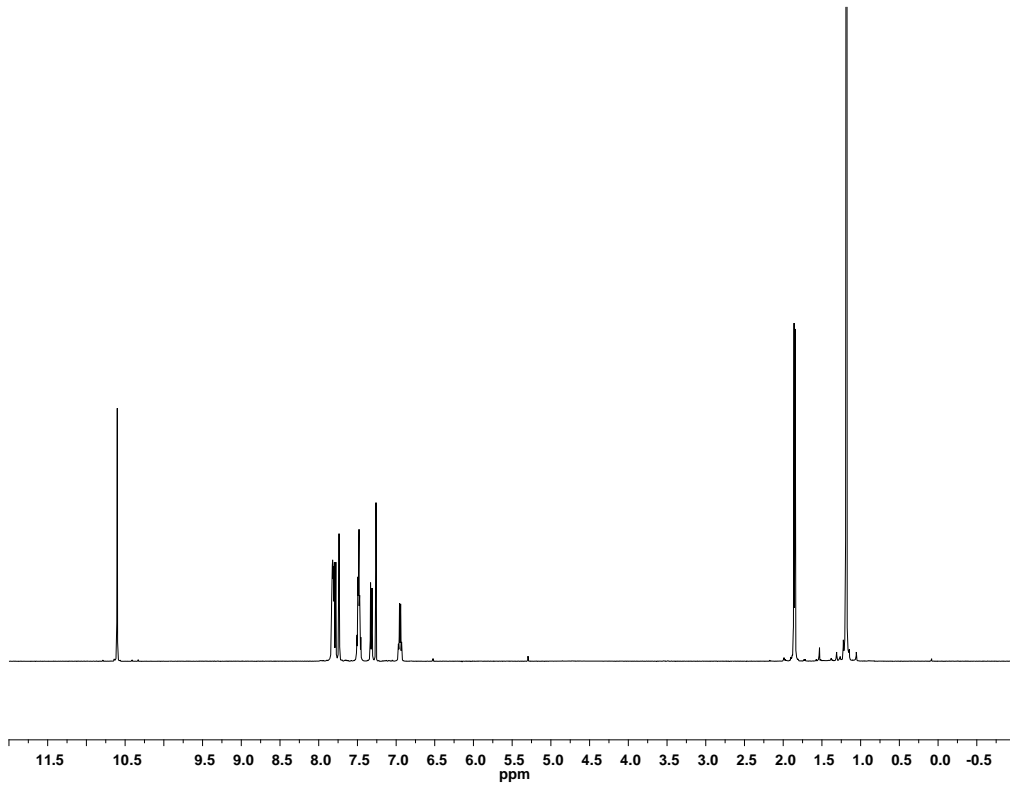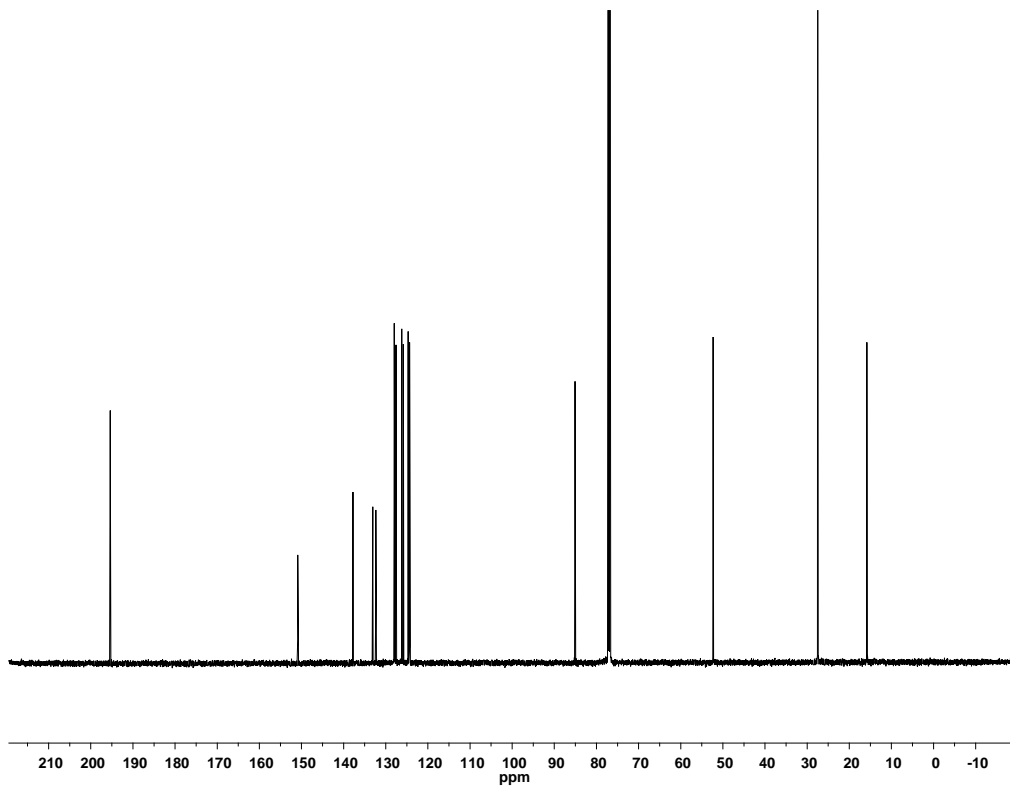

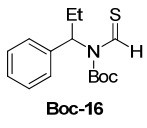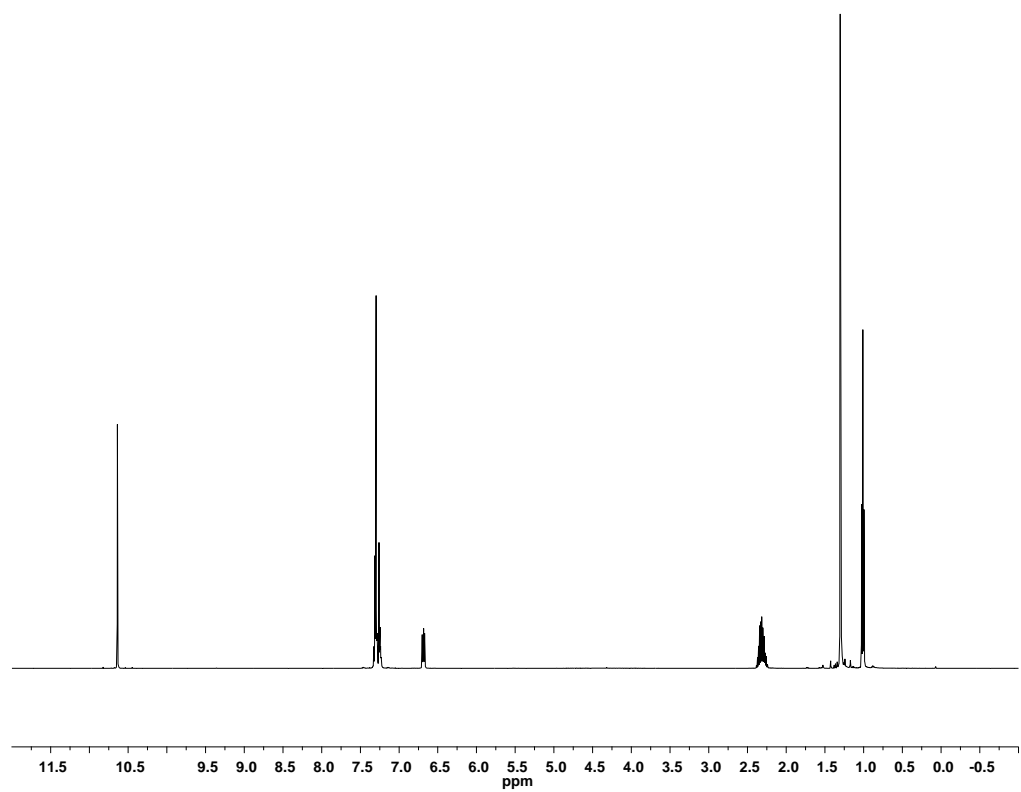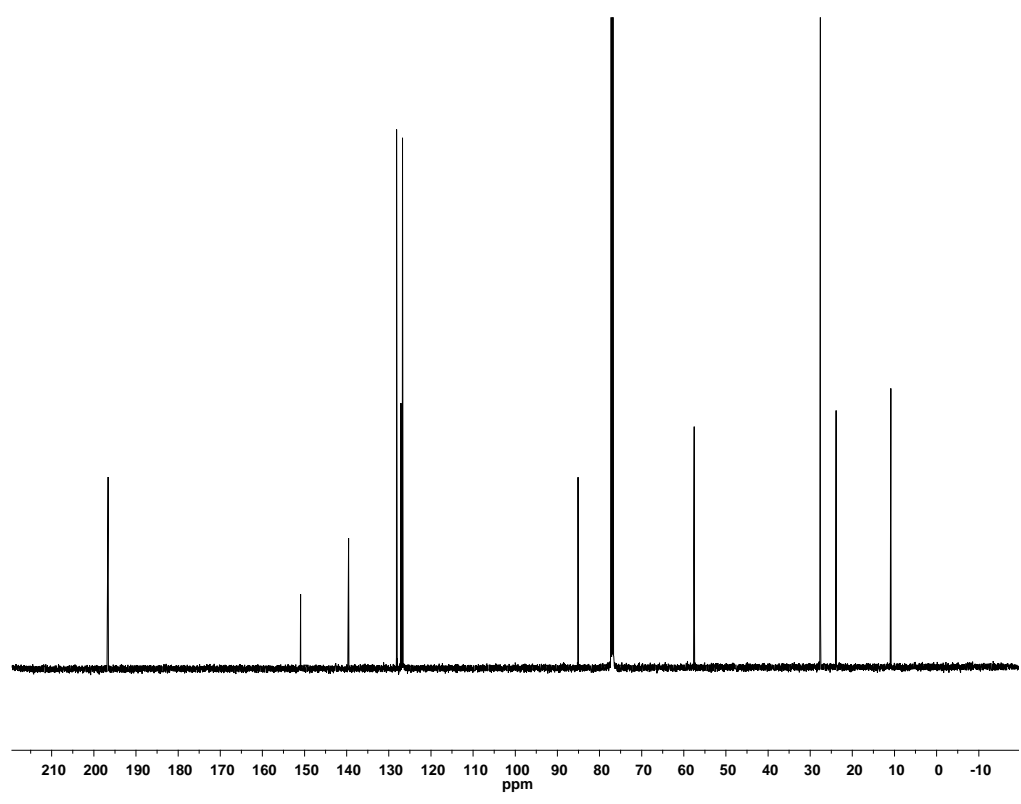

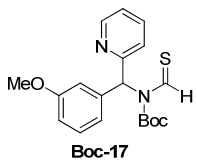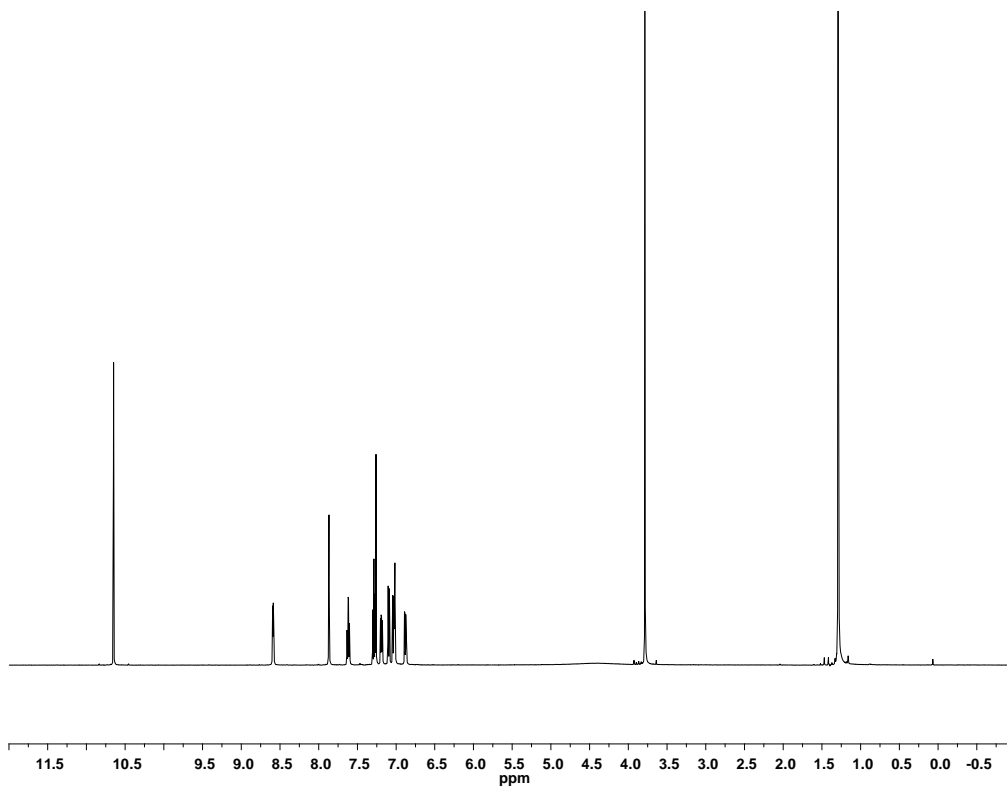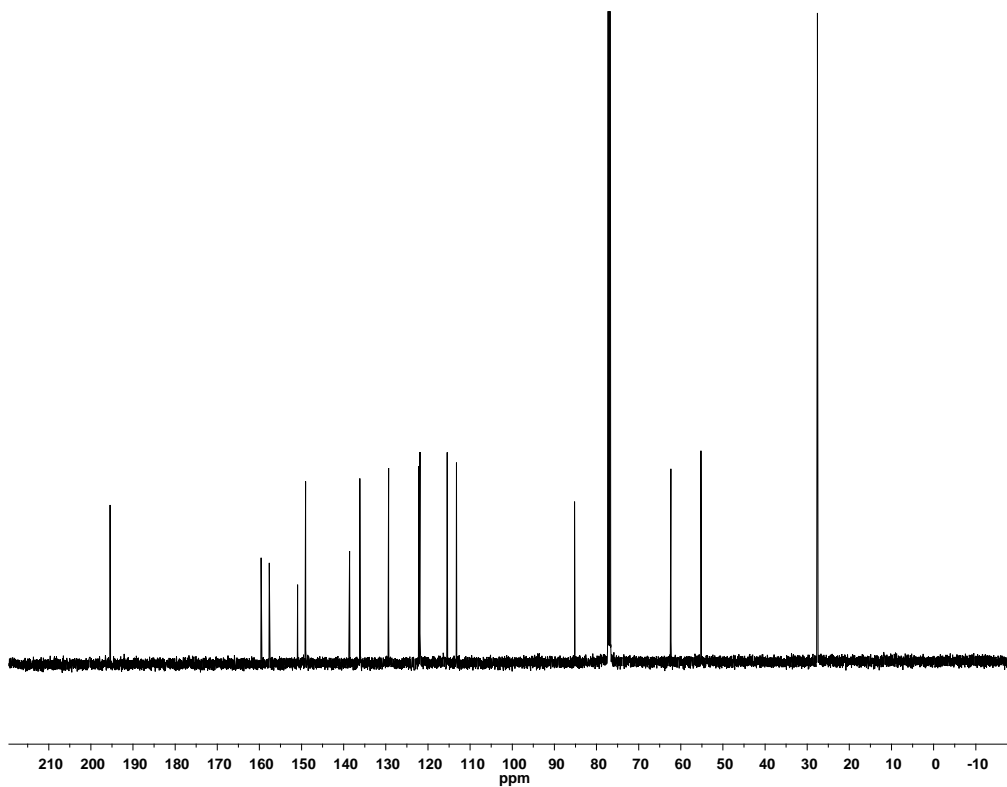



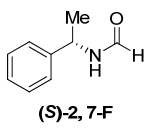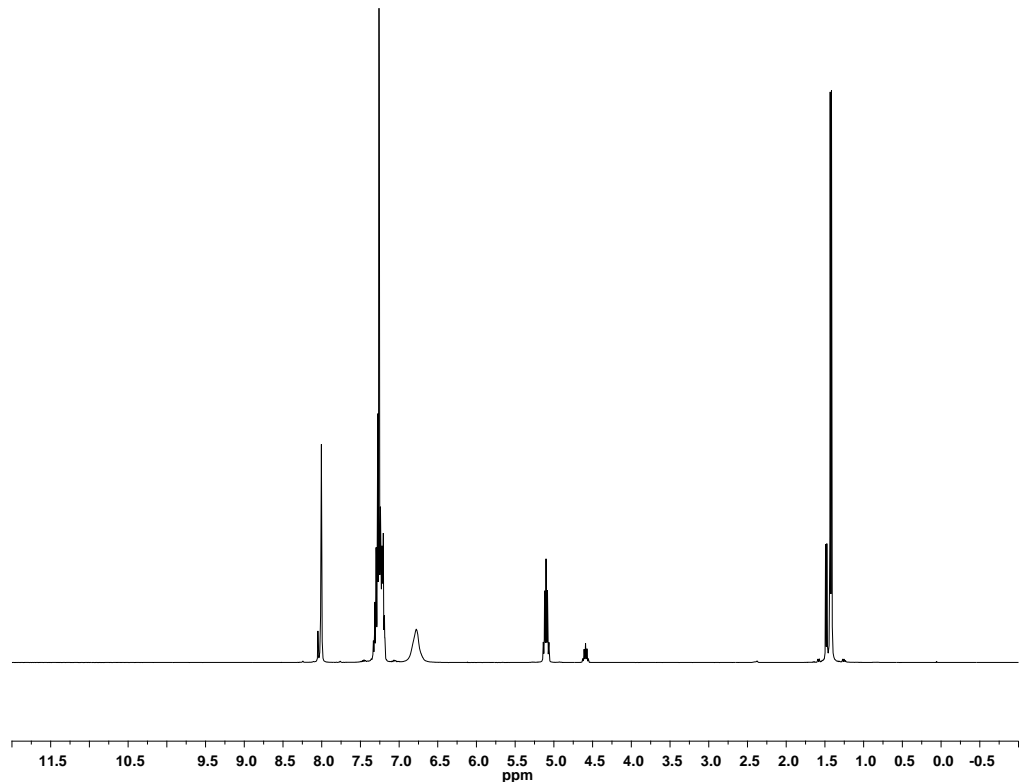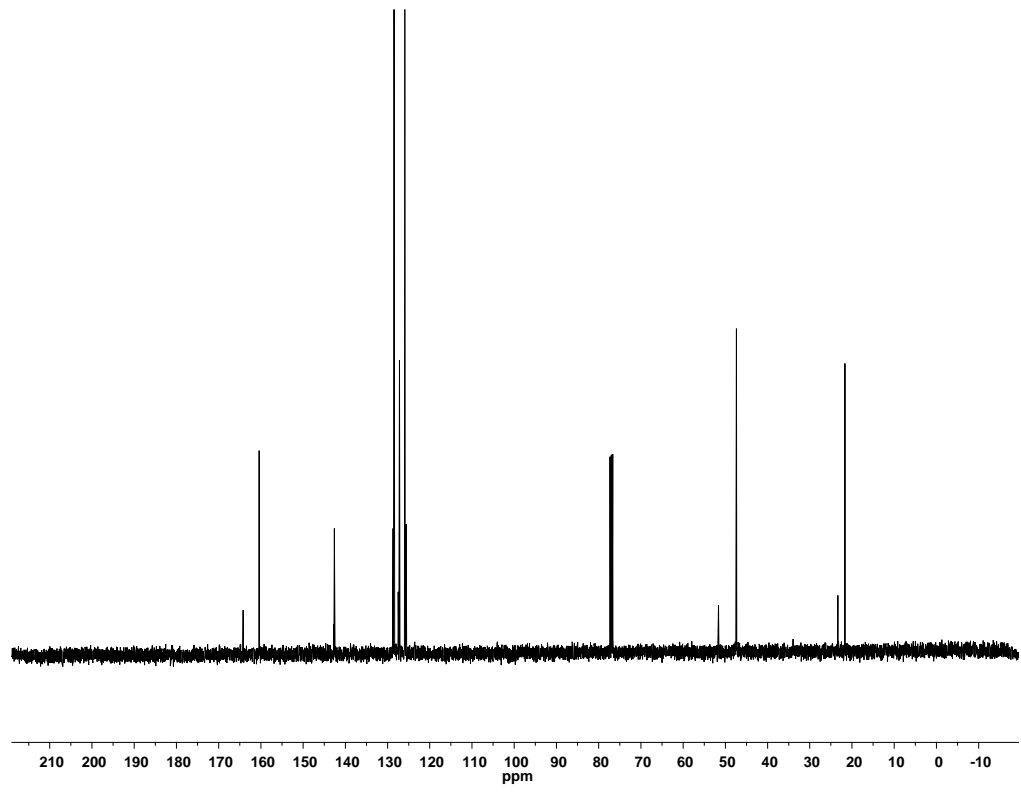

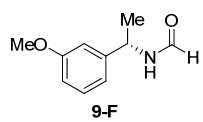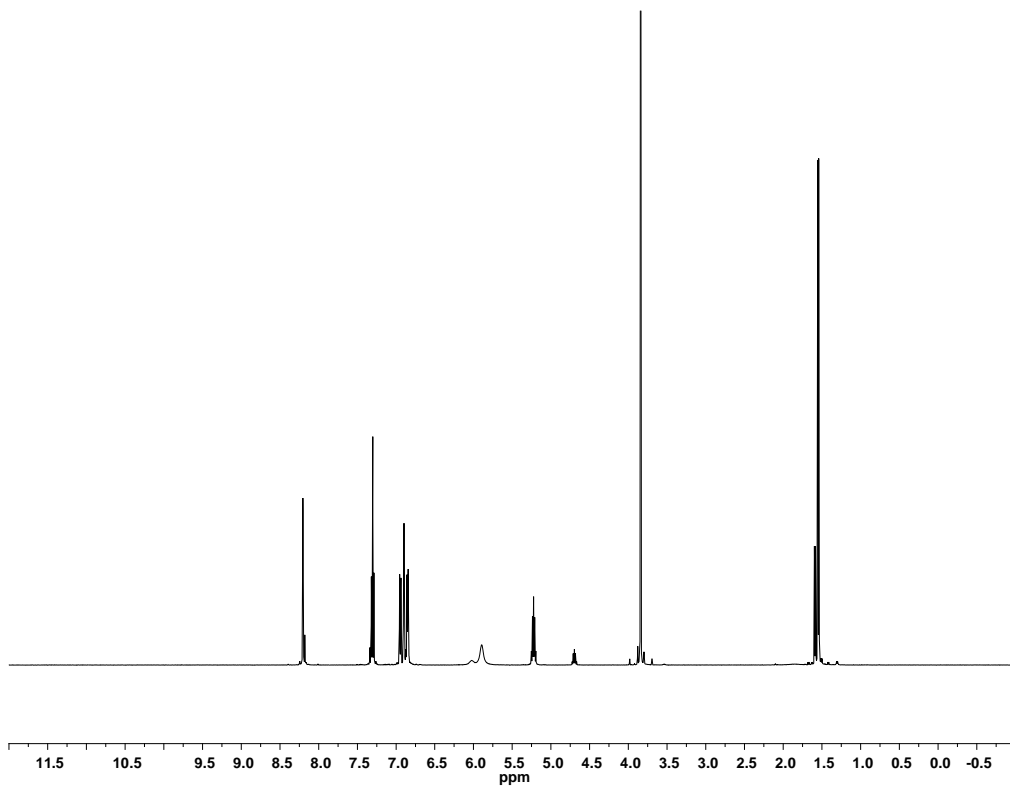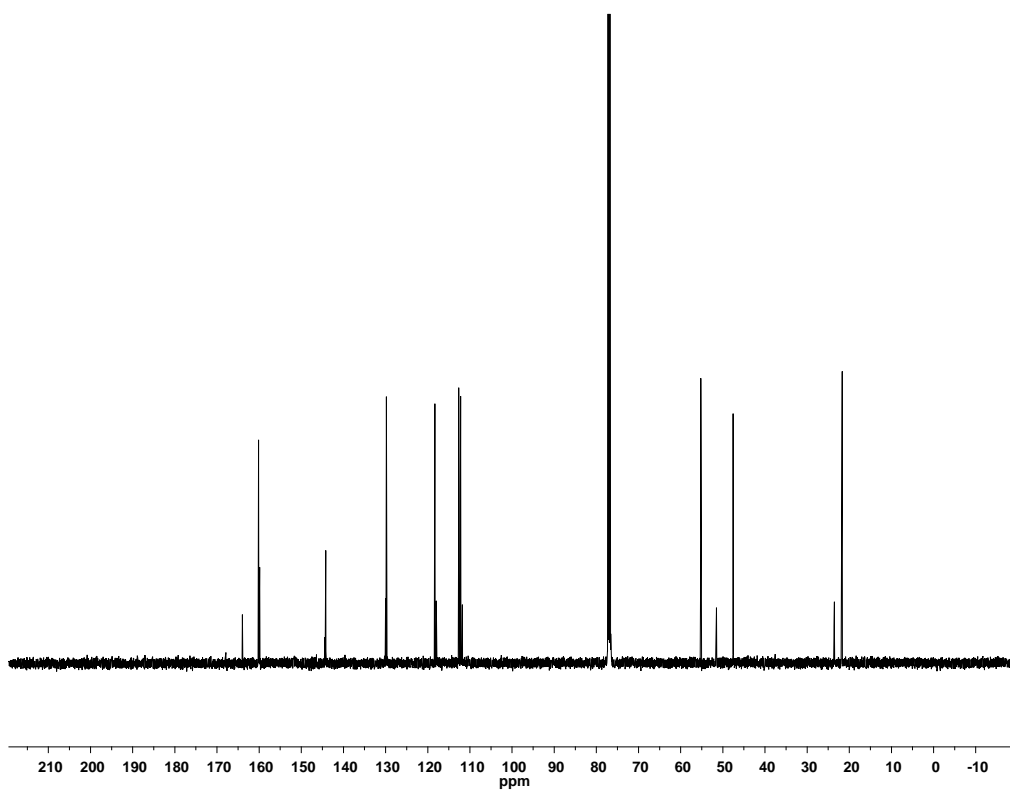

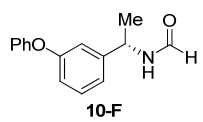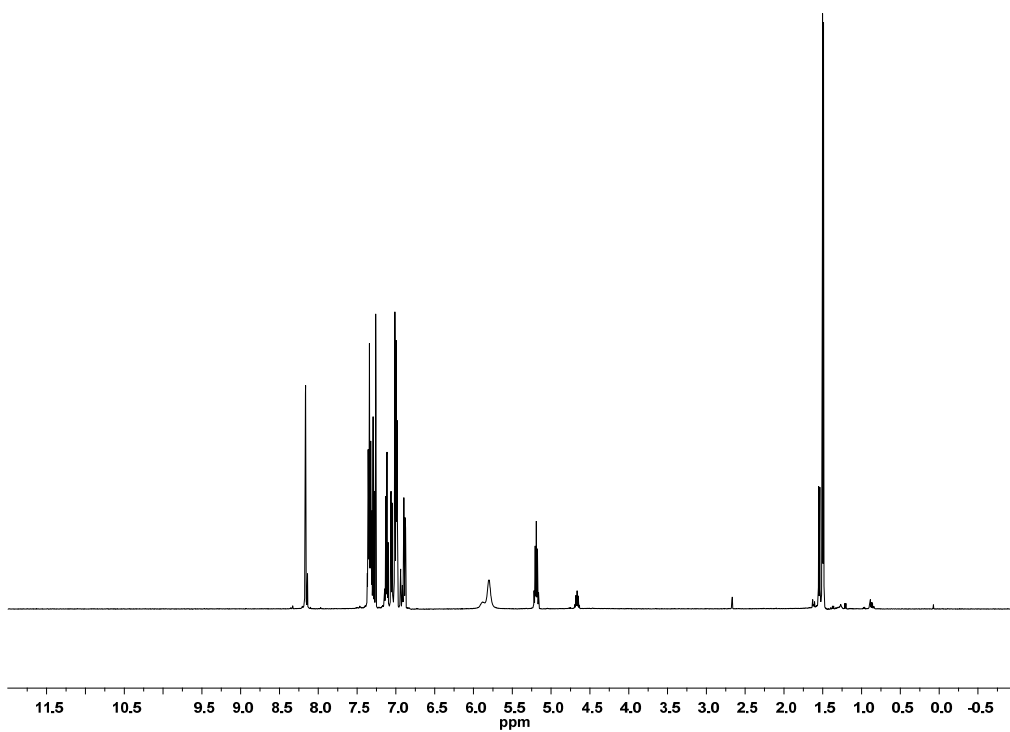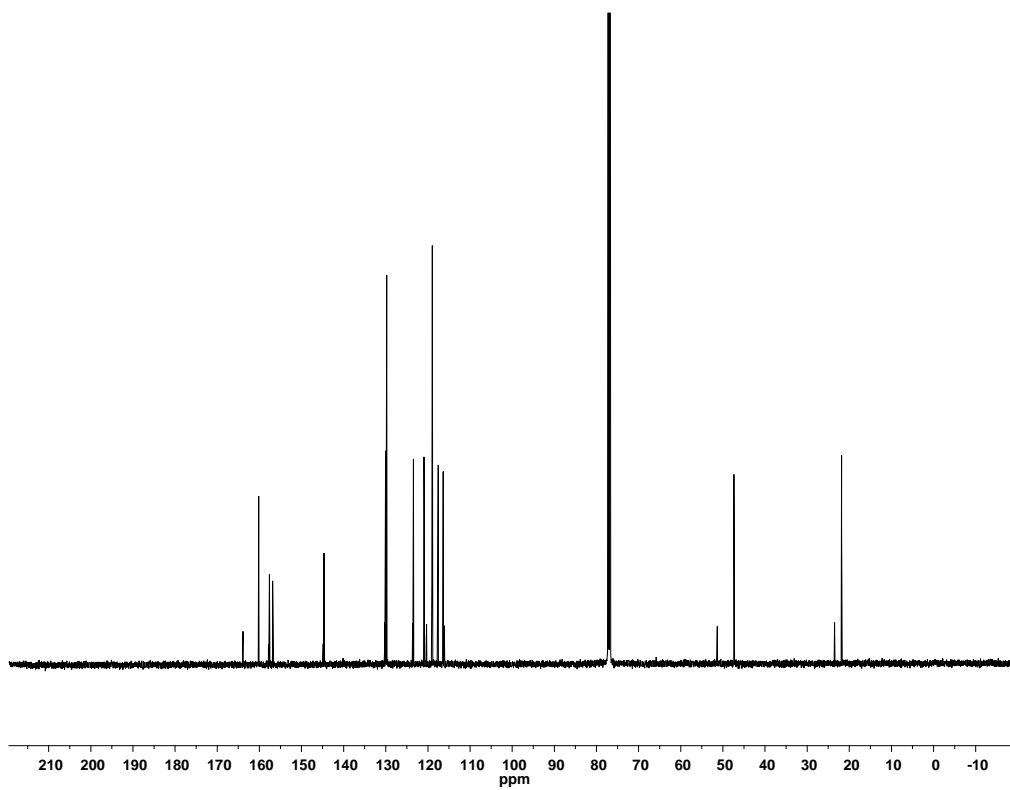

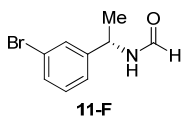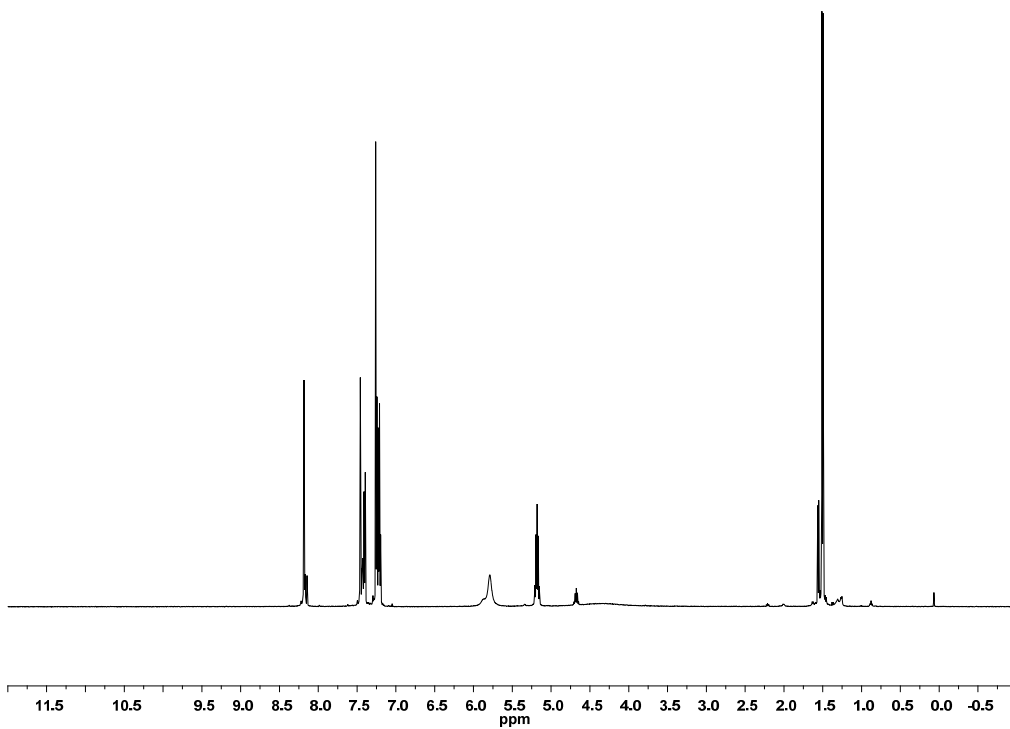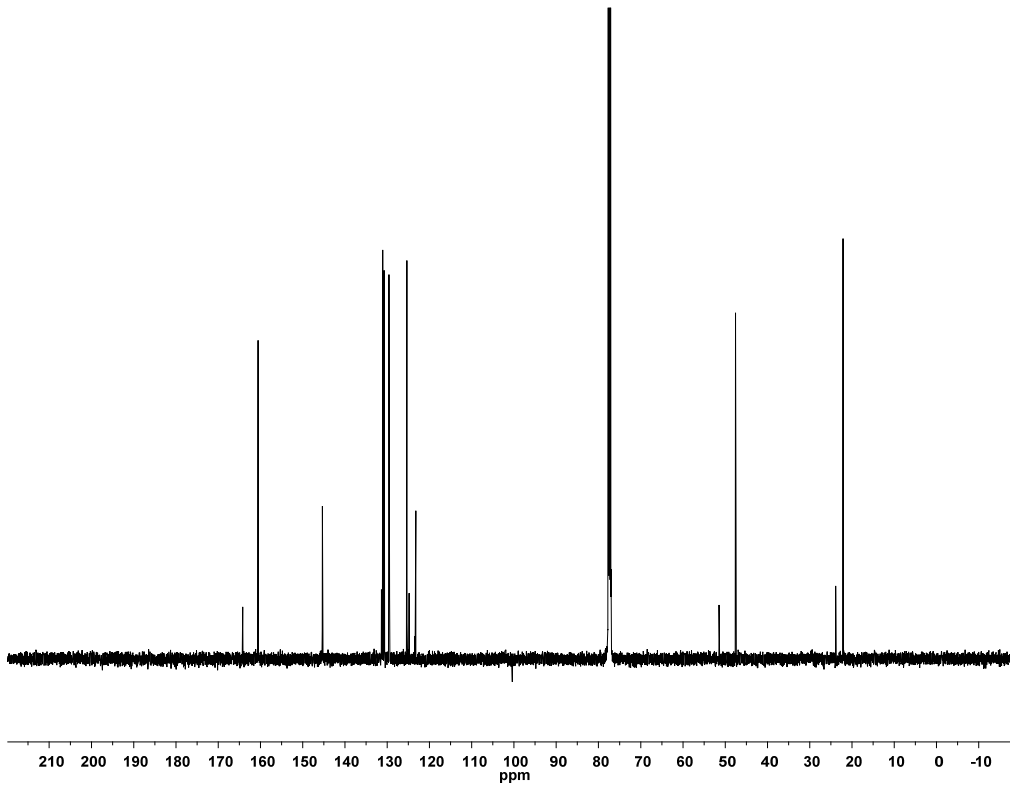

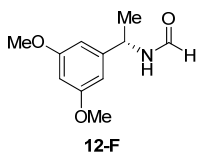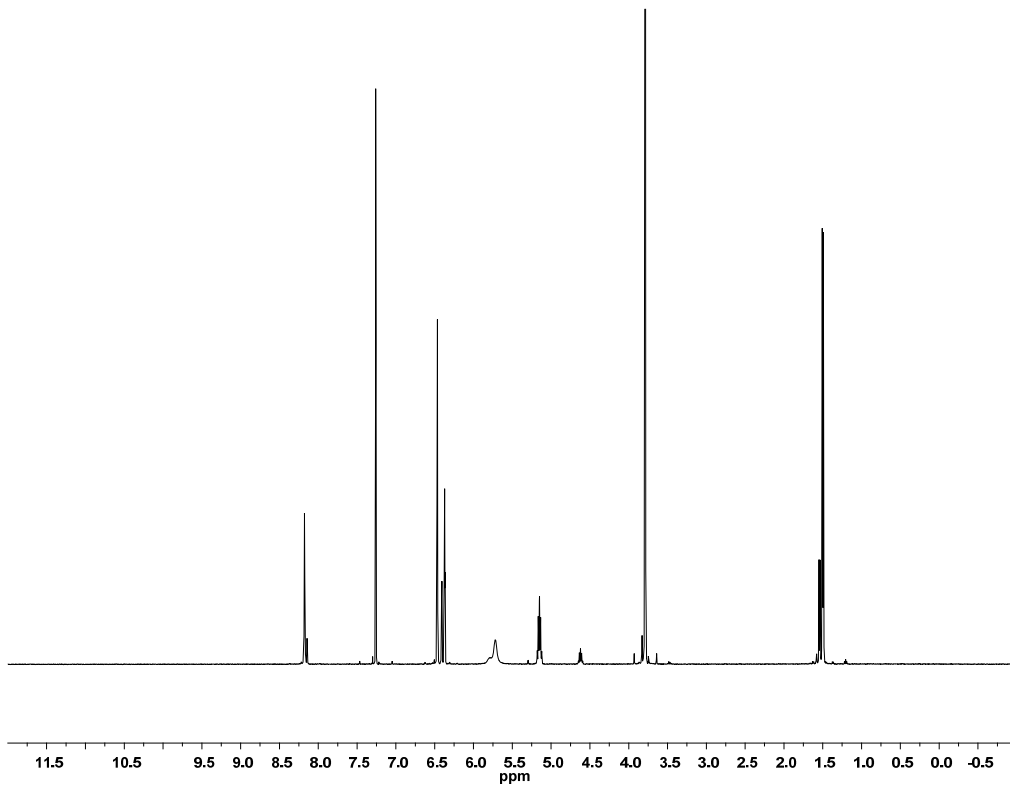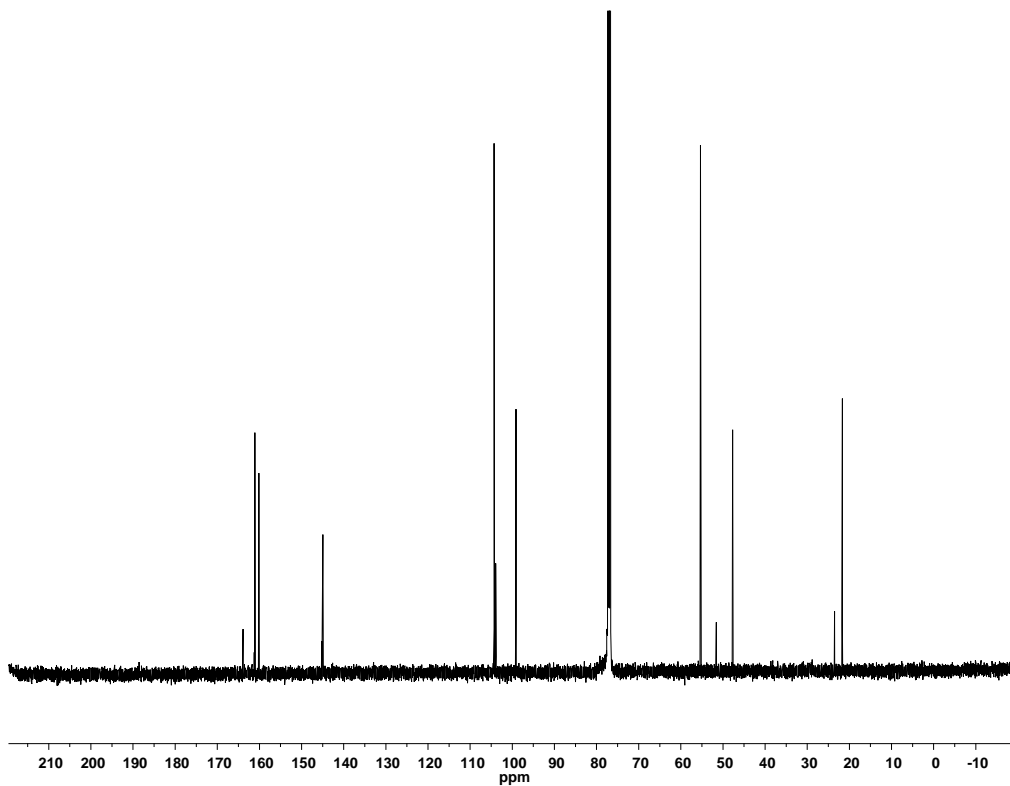

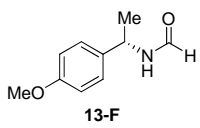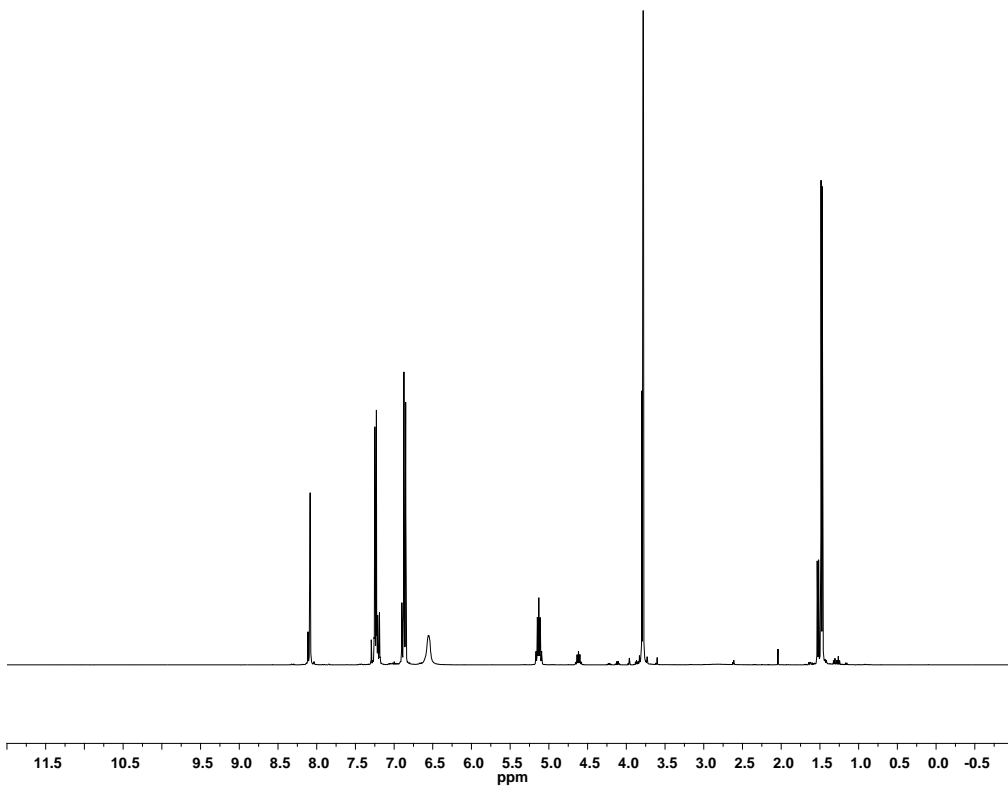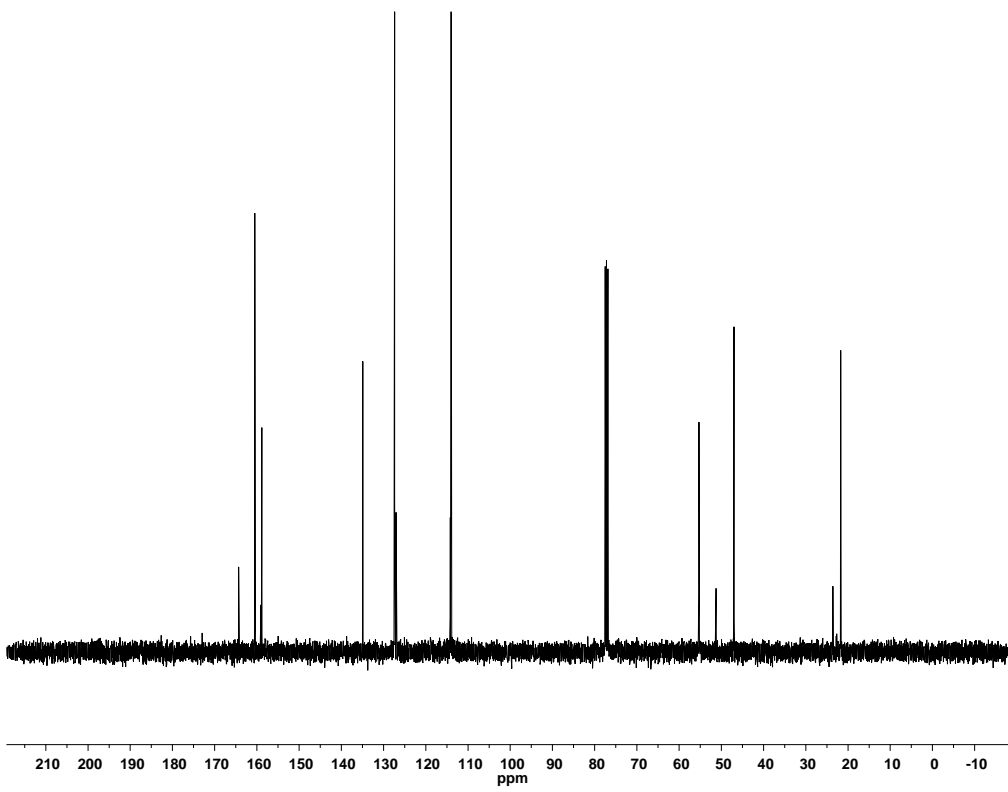

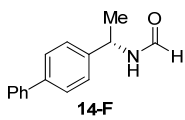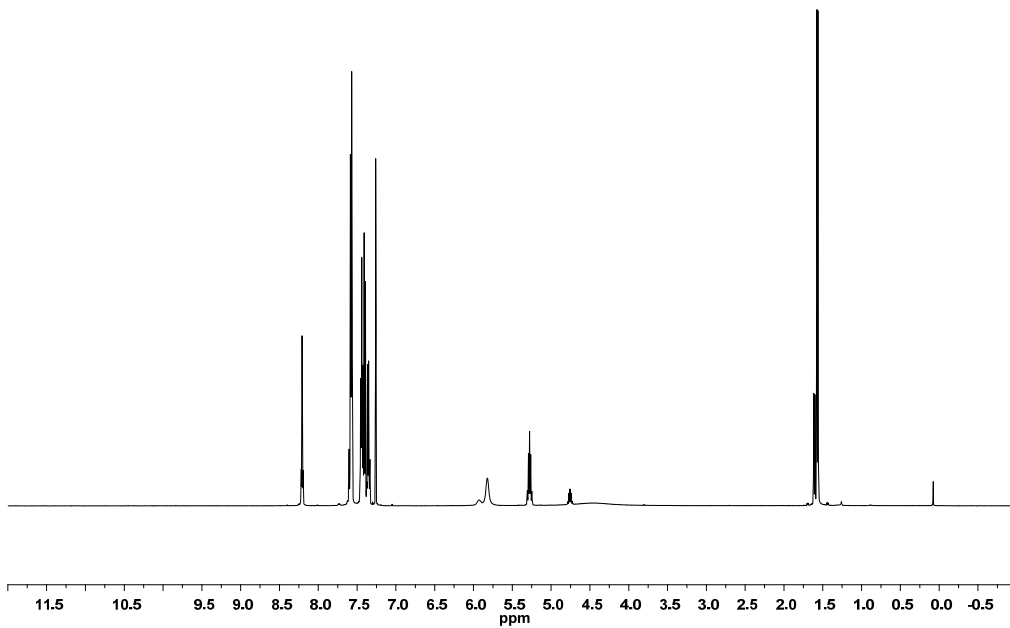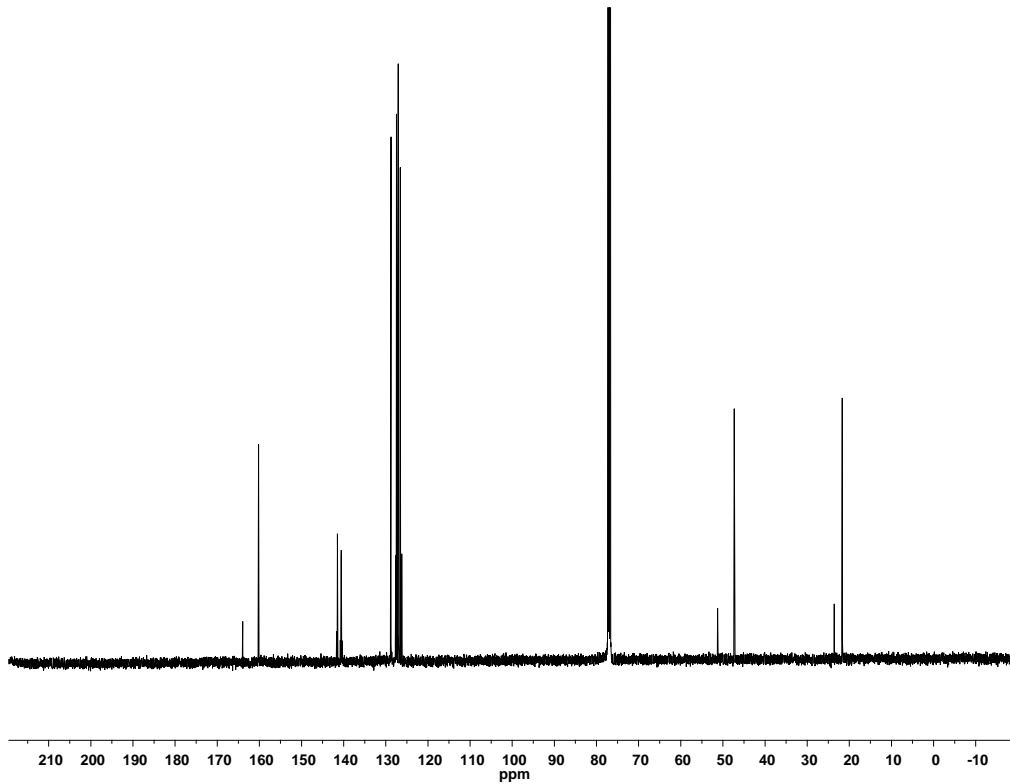

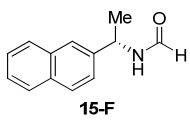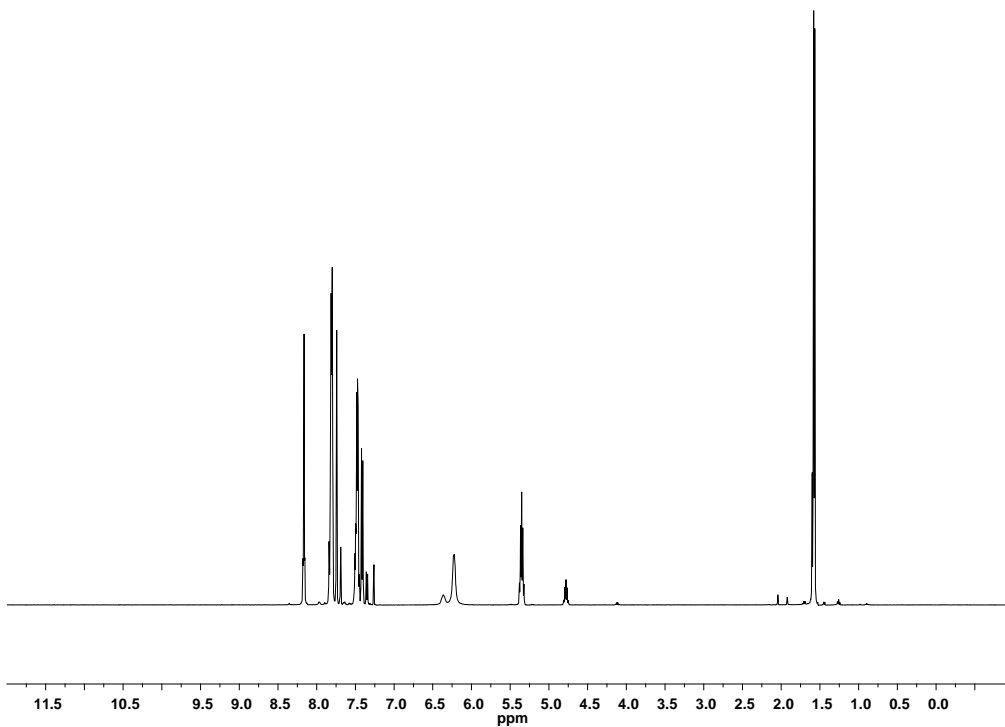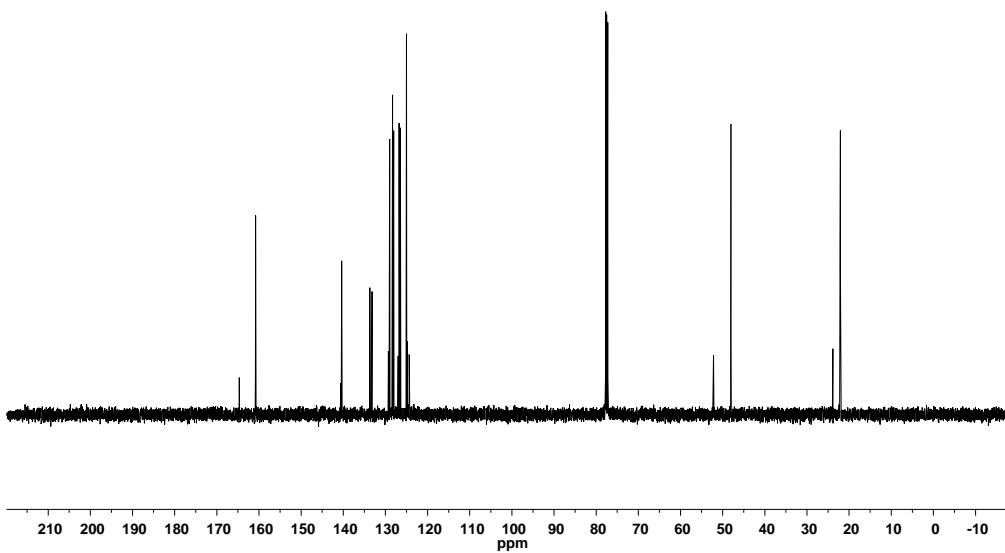



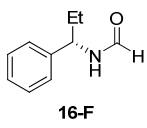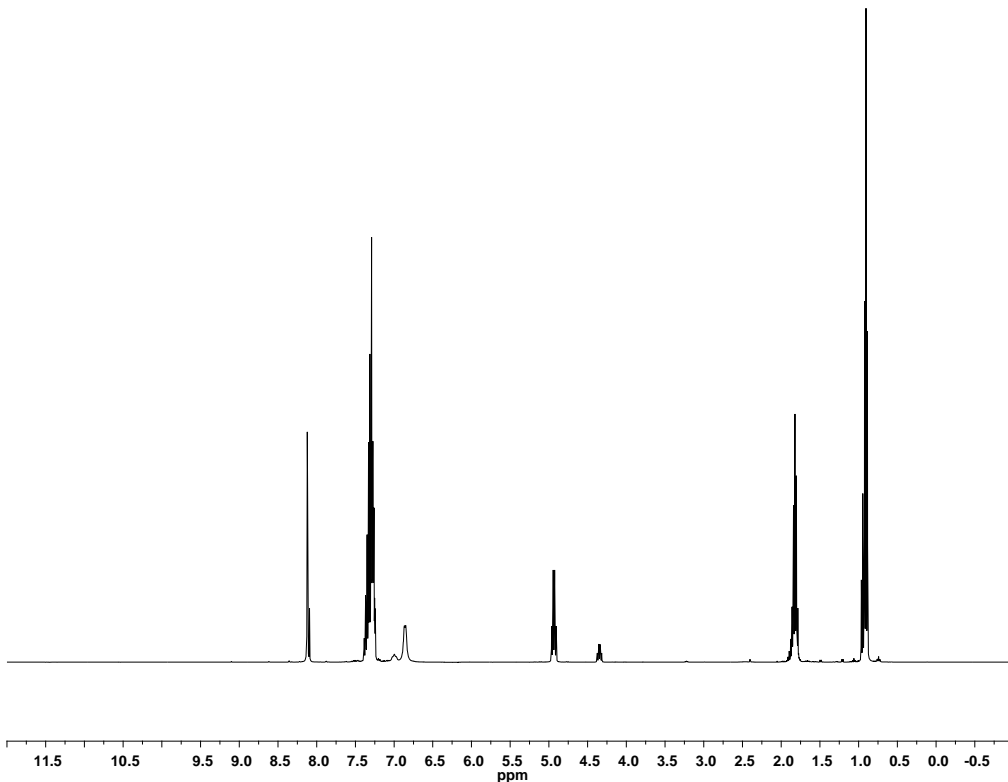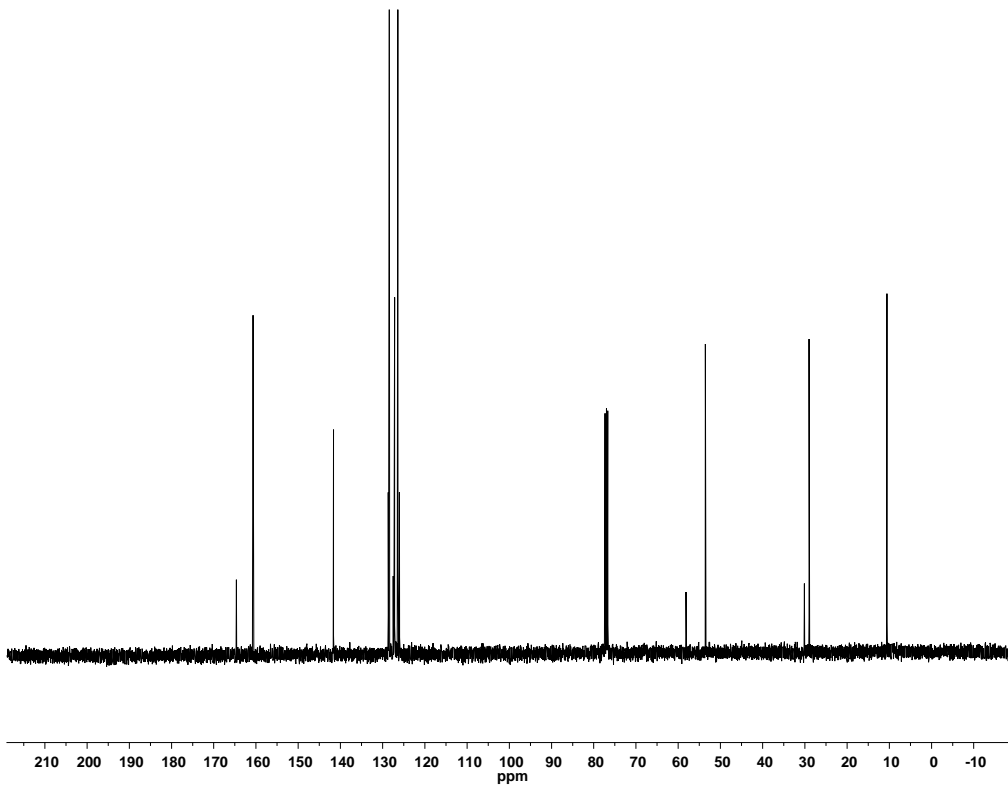

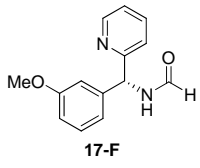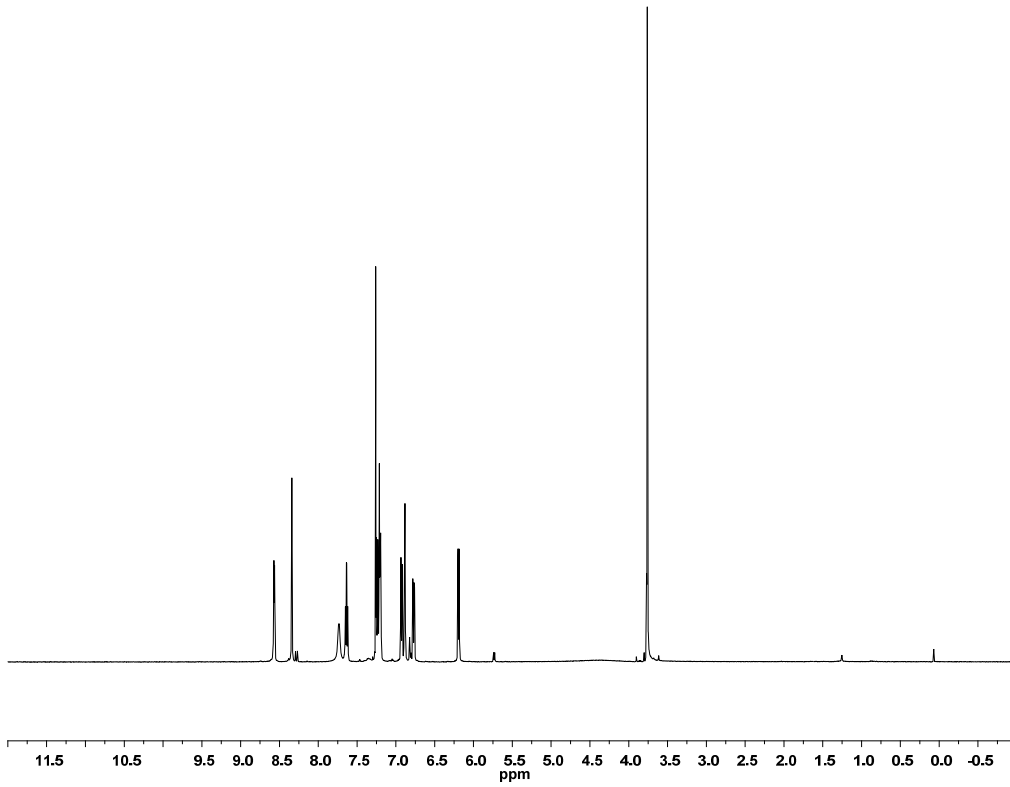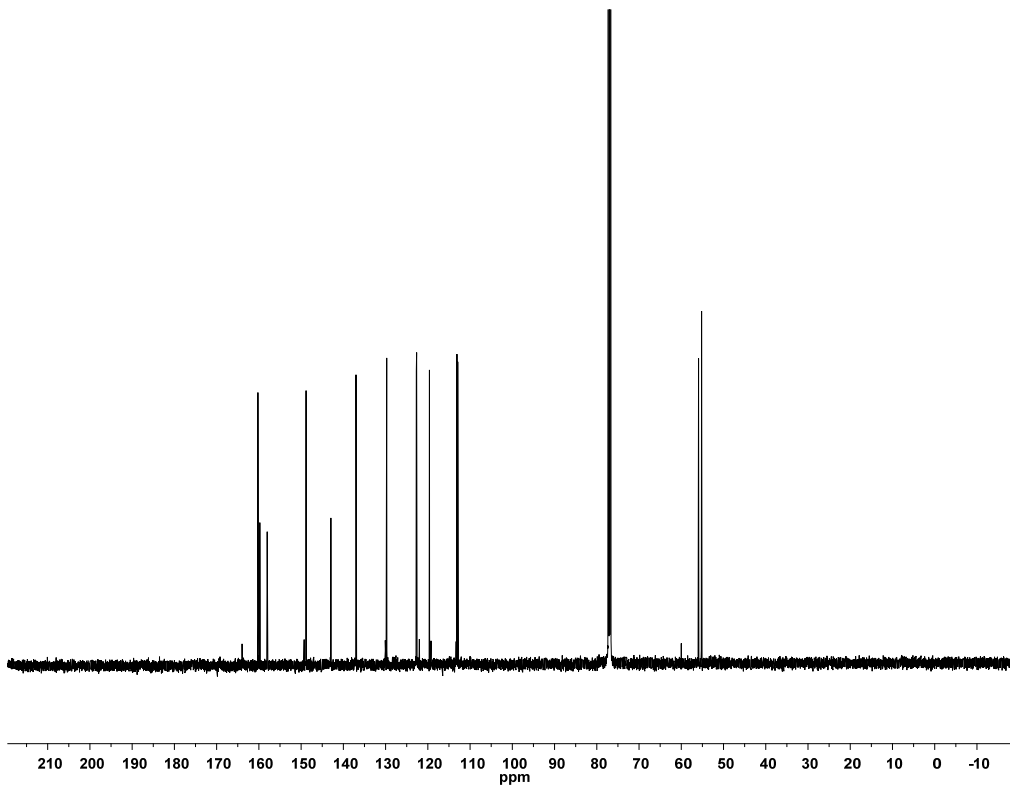

Supplement: NIHMS179955-supplement-2_si_002.pdf [file NIHMS179955-supplement-2_si_002.pdf]
